# Supplementary material for: Functional modularity in lake-dwelling characin fishes of Mexico
Source: PeerJ journal article supplement (doi:10.7717/peerj.3851), 2017-09-22

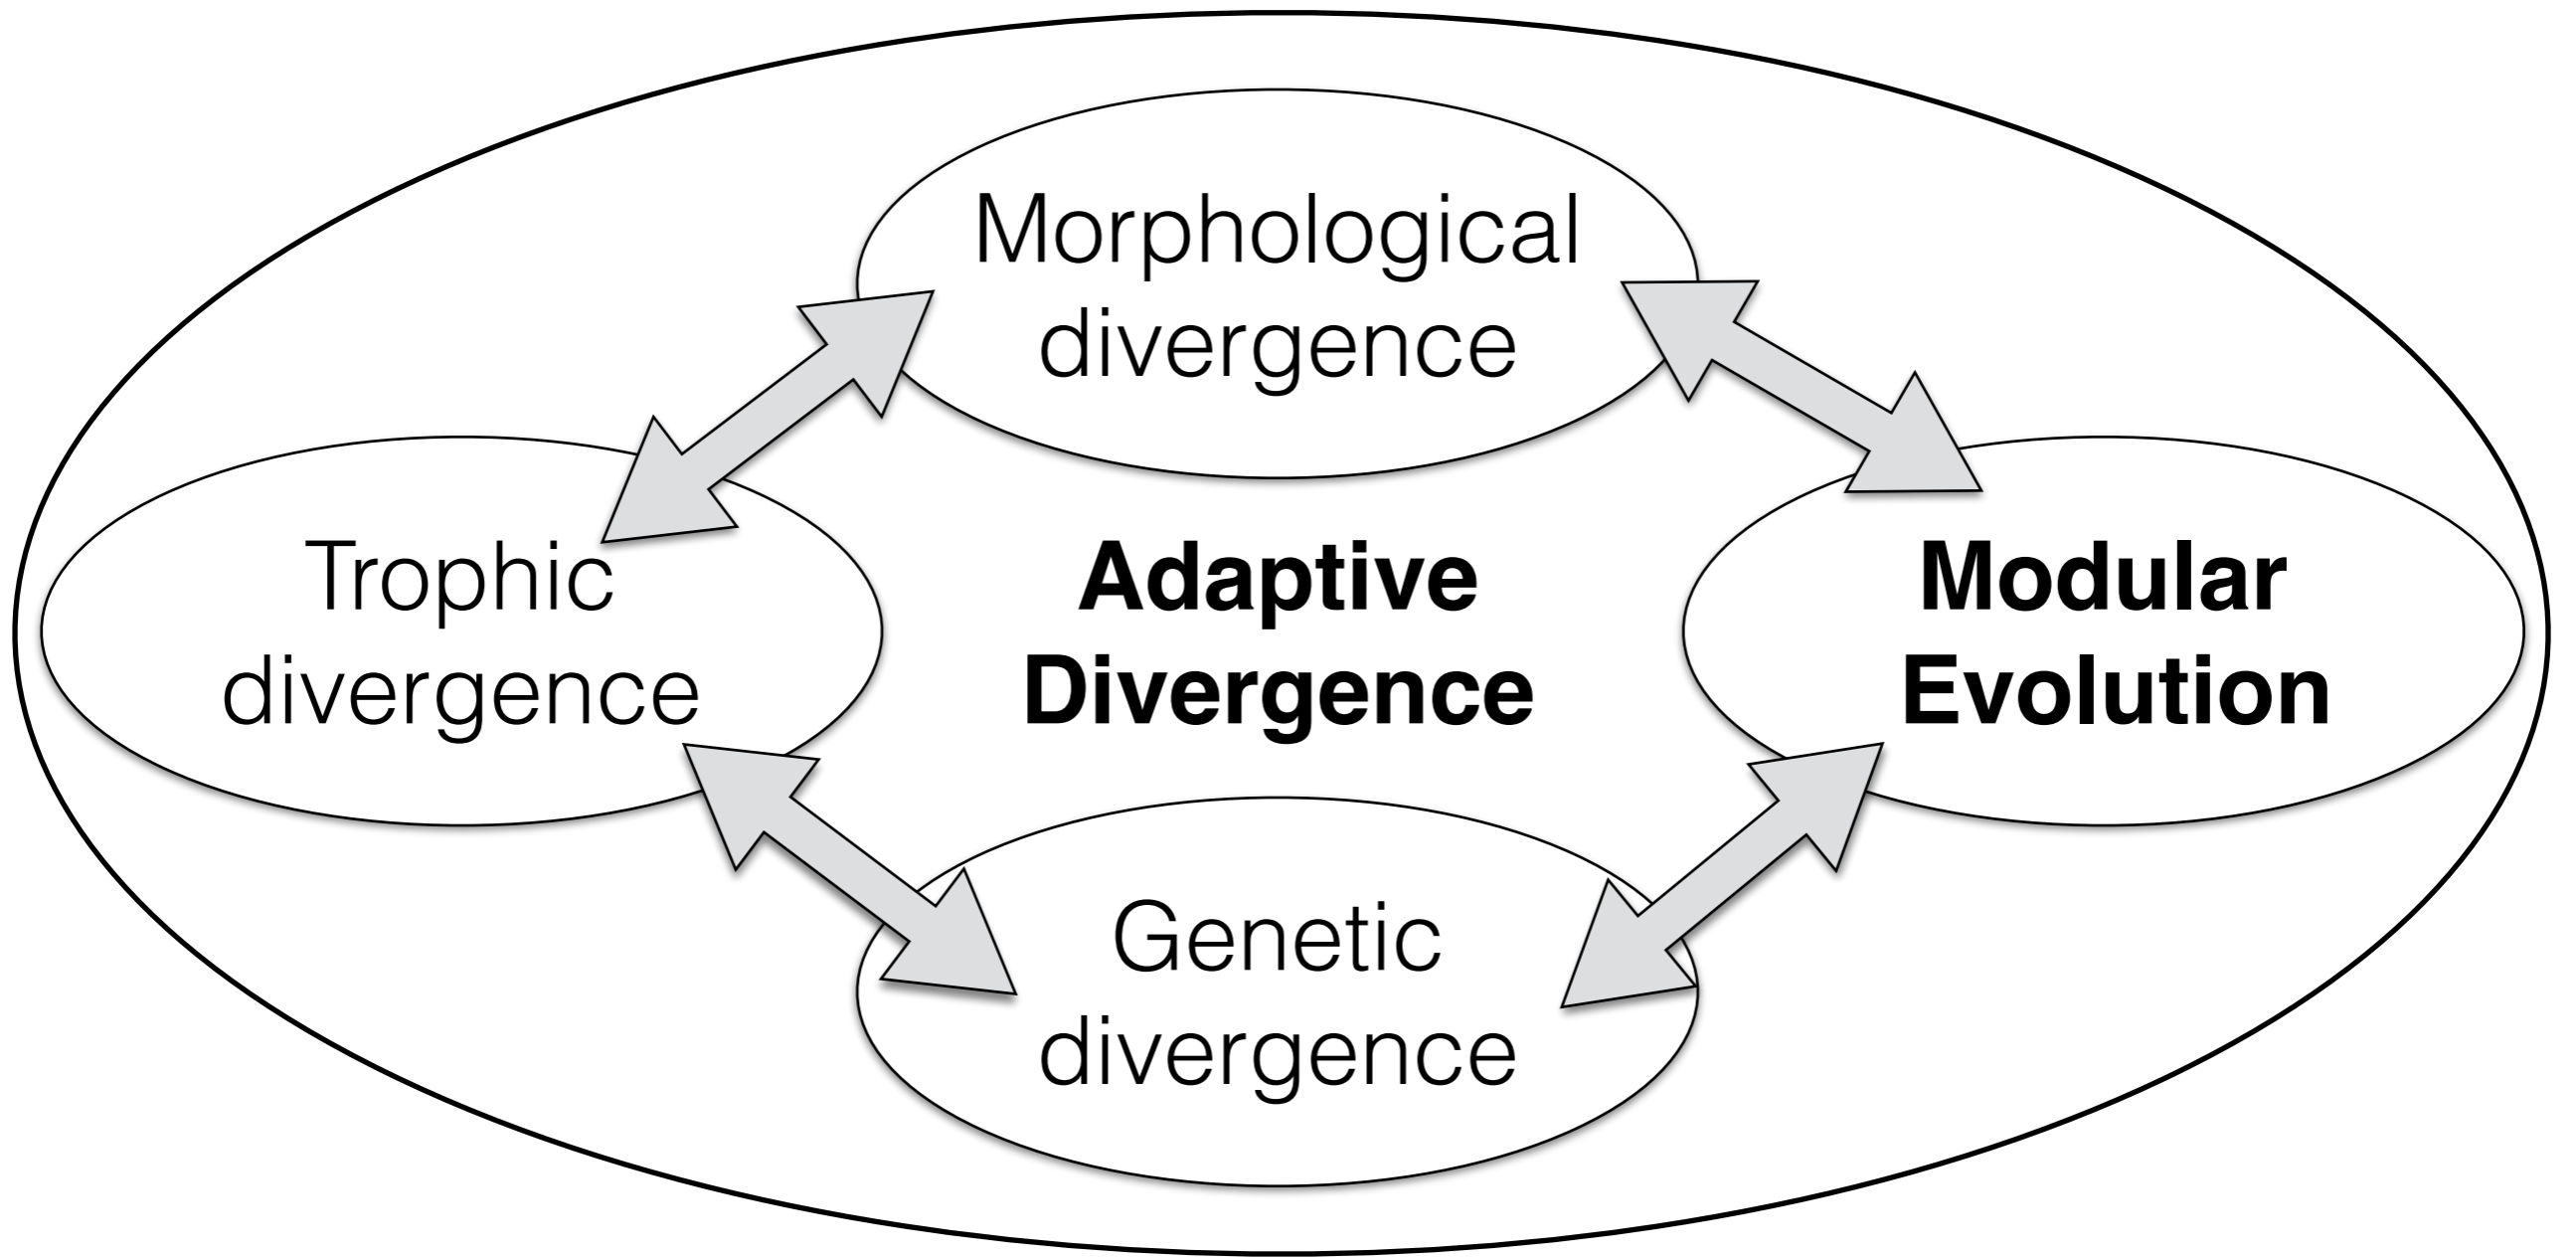

Supplement: SM2.pdf [file SM2.pdf]
