# Supplementary material for: Functional modularity in lake-dwelling characin fishes of Mexico
Source: PeerJ. 2017 Sep 22;5:e3851. doi: 10.7717/peerj.3851 (PMC5611896; doi:10.7717/peerj.3851)
Supplement: Supplemental Information 3 [file peerj-05-3851-s003.xls]

## Sheet: MS_Modularity
Id	Morphotype	SEX	RawCoord1	RawCoord2	RawCoord3	RawCoord4	RawCoord5	RawCoord6	RawCoord7	RawCoord8	RawCoord9	RawCoord10	RawCoord11	RawCoord12	RawCoord13	RawCoord14	RawCoord15	RawCoord16	RawCoord17	RawCoord18	RawCoord19	RawCoord20	RawCoord21	RawCoord22	RawCoord23	RawCoord24	RawCoord25	RawCoord26	RawCoord27	RawCoord28	RawCoord29	RawCoord30	RawCoord31	RawCoord32	RawCoord33	RawCoord34	RawCoord35	RawCoord36	Centroid Size	Log Centroid Size	ProcCoord1	ProcCoord2	ProcCoord3	ProcCoord4	ProcCoord5	ProcCoord6	ProcCoord7	ProcCoord8	ProcCoord9
Oxo_5	A	J	1.90162	8.70468	2.14438	8.72202	2.5432	8.70468	2.35246	8.7278	2.72816	9.14396	2.73394	8.0631	3.08074	8.56596	2.66458	8.27118	3.08652	8.17292	4.09802	9.3347	4.67602	9.17864	3.9882	7.99952	4.72804	8.02264	5.5488	9.03992	5.71642	8.48504	6.0979	9.0168	6.25974	8.77982	6.10946	8.51972	6.51357	1.87389	-0.308149	0.026846	-0.270776	0.0275314	-0.209755	0.021632	-0.238821	0.0267257	-0.177816
Oxo_3	A	J	2.49702	8.30244	2.67415	8.31387	2.97699	8.30244	2.82272	8.30244	3.14841	8.67385	3.14841	7.85675	3.37126	8.19959	3.07413	8.01674	3.41126	7.94817	4.2055	8.82242	4.63405	8.73099	4.09694	7.84532	4.59406	7.90246	5.30259	8.62814	5.41687	8.21102	5.77114	8.60528	5.82828	8.44529	5.72543	8.2453	5.0046	1.61036	-0.307329	0.0236876	-0.271845	0.0233608	-0.211642	0.0166313	-0.242398	0.0189001	-0.172011
CueL_3	A	J	2.00575	8.1764	2.24439	8.19913	2.63645	8.1764	2.42621	8.18776	2.78986	8.62528	2.79554	7.55138	3.1251	8.0173	2.71031	7.77298	3.21601	7.65365	4.26718	8.86392	4.8297	8.72755	4.1365	7.39796	4.81265	7.47751	5.85814	8.55709	5.96042	7.99457	6.47748	8.51164	6.64226	8.23322	6.42066	7.96616	6.93996	1.9373	-0.297482	0.0234601	-0.262966	0.0250263	-0.206694	0.0189554	-0.236874	0.0220923	-0.1814
Aga_10	A	J	1.58141	8.34309	1.7849	8.33146	2.20351	8.31983	1.97095	8.32565	2.43025	8.79658	2.43607	7.58727	2.71514	8.14541	2.22095	7.87216	2.74421	7.69774	4.06399	9.02914	4.60469	8.87216	3.8198	7.43611	4.61632	7.50006	5.63958	8.70356	5.84888	8.0582	6.38377	8.61053	6.50587	8.3489	6.30238	8.07565	7.51343	2.01669	-0.290619	0.0272275	-0.263607	0.0246086	-0.207984	0.0208538	-0.238888	0.0228538	-0.175307
Cha_16	A	J	2.5877	8.00605	2.75155	8.01735	3.05665	8.00605	2.89845	8.00605	3.1866	8.3846	3.164	7.58795	3.41825	7.91565	3.1188	7.7631	3.44085	7.6614	4.1471	8.4863	4.51435	8.41285	4.05105	7.5597	4.55955	7.62185	5.13585	8.3281	5.28275	7.97215	5.5709	8.2942	5.65565	8.1247	5.5709	7.9552	4.59454	1.52487	-0.307939	0.0242461	-0.272175	0.0239062	-0.206147	0.0162563	-0.240484	0.0189523	-0.171486
Aga_5	A	F	1.4942	8.56984	1.7442	8.58728	2.22095	8.58146	1.95932	8.57565	2.42444	9.02333	2.43607	7.77332	2.73258	8.42449	2.23258	8.09309	2.77909	7.90123	4.05236	9.29659	4.68608	9.12798	3.89538	7.62215	4.71515	7.72099	5.69772	8.94193	5.80819	8.26169	6.41866	8.86054	6.52331	8.54077	6.31982	8.26169	7.61113	2.02961	-0.300419	0.0262434	-0.267496	0.027336	-0.204911	0.0242886	-0.239298	0.024779	-0.176064
Cate_13	A	F	0.938814	10.6807	1.24495	10.6263	1.74837	10.5651	1.46945	10.5787	2.05451	11.1025	2.02729	9.49699	2.40826	10.2181	1.77558	10.0616	2.31302	9.67387	4.27228	11.3882	5.03422	11.2249	3.95935	9.12282	5.4492	9.36093	6.51727	10.9936	6.72136	10.0888	7.4765	10.8508	7.66698	10.463	7.36765	10.0888	10.3653	2.33846	-0.286768	0.0359023	-0.257287	0.0300907	-0.208773	0.0232488	-0.235686	0.025082	-0.178204
Cate_15	A	F	0.940466	10.2657	1.25175	10.1928	1.66237	10.1729	1.45044	10.1862	2.03988	10.6829	2.05975	9.03377	2.31143	9.78879	1.74847	9.60335	2.23857	9.25233	4.21885	11.1531	5.09309	11.067	4.42416	8.87482	5.51696	8.99403	6.51041	10.9478	6.8548	10.0272	7.52373	10.9147	7.66943	10.5968	7.5171	10.1994	10.6246	2.36317	-0.280885	0.0428438	-0.252304	0.033132	-0.213863	0.0274223	-0.233678	0.0306486	-0.173676
Cate_19	A	F	0.77405	8.5202	1.11305	8.55975	1.6159	8.5202	1.35035	8.5428	1.89275	9.0852	1.89275	7.6501	2.19785	8.3168	1.71195	8.02865	2.1809	7.8083	3.6725	9.35075	4.31095	9.15865	3.4804	7.49755	4.37875	7.65575	5.72345	8.86485	5.6952	8.2151	6.36755	8.86485	6.53705	8.5428	6.328	8.2151	8.63469	2.15579	-0.30371	0.023882	-0.264296	0.0270084	-0.206251	0.020281	-0.236896	0.0240319	-0.171784
Cate_31	A	F	0.757911	9.93564	1.15279	9.9229	1.67505	9.89743	1.41392	9.91016	1.94254	10.5662	1.94891	8.91023	2.38837	9.66177	1.84064	9.36243	2.42022	9.06309	4.14622	10.9865	4.85318	10.8209	3.77045	8.62363	5.08883	8.84654	6.369	10.5598	6.50912	9.66814	7.21608	10.356	7.41988	10.0312	7.03138	9.62993	10.0512	2.30769	-0.299198	0.028621	-0.260027	0.0251216	-0.208263	0.0196322	-0.234147	0.022377	-0.177884
Cate_32	A	F	0.770649	10.1713	1.10821	10.1649	1.60499	10.1394	1.33749	10.1458	1.95528	10.7063	1.94891	9.04398	2.3629	9.88469	1.80243	9.53439	2.42022	9.26053	4.12711	11.1075	4.91687	10.9993	4.0061	8.77011	5.47097	9.286	6.33079	10.9929	6.57918	10.2159	7.18423	11.1776	7.40078	10.9165	7.45173	10.5407	10.379	2.33978	-0.291606	0.0432719	-0.259415	0.0379051	-0.212269	0.028457	-0.237754	0.0328456	-0.170807
Cha_17	A	F	1.58849	8.18816	1.81705	8.16531	2.25703	8.14245	2.02276	8.14245	2.4913	8.59386	2.4913	7.39392	2.76558	7.9996	2.33131	7.70819	2.79986	7.51962	4.18265	8.87384	4.75405	8.72528	3.9198	7.27392	4.86261	7.36535	5.84542	8.51386	6.00541	7.92532	6.58824	8.45672	6.68538	8.17102	6.46825	7.88532	7.75756	2.04867	-0.294776	0.0288944	-0.265451	0.0247426	-0.208894	0.0194718	-0.239073	0.0207112	-0.176327
CueR_1	A	F	0.653366	10.0072	1.08672	10.0872	1.60008	10.0605	1.3334	10.0738	1.85343	10.6872	1.86009	9.01378	2.33345	9.81382	1.77342	9.40714	2.26678	9.18046	4.16021	11.1206	5.12026	10.9205	4.21354	8.92711	5.12026	9.00045	6.42699	10.6205	6.51366	9.72049	7.3937	10.4472	7.54038	10.0738	7.30703	9.68715	10.4436	2.34599	-0.301723	0.0212496	-0.259886	0.0269143	-0.210862	0.0220137	-0.236332	0.0245098	-0.183735
CueR_7	A	F	0.95742	10.7444	1.34748	10.7798	1.85101	10.7727	1.60279	10.7515	2.14888	11.4394	2.16306	9.77278	2.60276	10.4536	2.0425	10.1416	2.67368	9.94298	4.37576	11.9926	5.16298	11.8578	4.22683	9.64512	5.55304	9.9288	6.92179	11.6025	7.05654	10.7089	7.85794	11.5529	8.0636	11.1557	7.74446	10.7515	10.8019	2.37972	-0.292659	0.0268315	-0.256392	0.026425	-0.210067	0.0210307	-0.233137	0.0214092	-0.176349
CueR_9	A	F	0.761645	10.3517	1.15902	10.365	1.67562	10.3451	1.38421	10.365	1.87431	10.9876	1.88093	9.38479	2.52336	10.0736	1.85444	9.77555	2.41077	9.504	4.15262	11.3783	4.954	11.173	3.88108	9.15299	5.18581	9.31856	6.47067	10.9213	6.50379	10.0471	7.31841	10.7425	7.49724	10.3915	7.25881	10.0338	10.2112	2.32349	-0.298684	0.0252568	-0.259739	0.0246976	-0.20928	0.0203414	-0.237702	0.0236455	-0.18683
CueR_21	A	F	0.617793	9.98659	0.936243	9.99296	1.40755	9.96112	1.1719	9.96748	1.65594	10.5089	1.66231	9.08856	2.12088	9.68088	1.52856	9.38154	2.10177	9.24142	3.77682	10.9292	4.56657	10.7381	3.52843	8.93571	4.85318	9.1013	6.15245	10.5025	6.16519	9.66177	6.96132	10.3241	7.19697	9.99933	6.904	9.62356	9.97075	2.29966	-0.29014	0.0247927	-0.258184	0.0240133	-0.211073	0.0187233	-0.234672	0.0204117	-0.183728
CueR_22	A	F	0.937006	12.3543	1.34645	12.3858	1.86614	12.3858	1.62204	12.3858	2.1496	13.1732	2.15748	11.3071	2.88976	12.1575	2.1811	11.6299	2.88188	11.4724	4.88188	13.622	5.85826	13.3543	4.74015	11.1417	6.07085	11.126	7.77951	12.9449	7.85038	11.9606	8.85038	12.8425	9.03148	12.3937	8.6929	11.937	12.3449	2.51324	-0.291741	0.0194981	-0.258486	0.0207547	-0.216398	0.0191126	-0.236169	0.0198841	-0.190956
CueR_27	A	F	0.868992	9.11251	1.1785	9.08275	1.67251	9.04109	1.39277	9.05299	1.88678	9.59462	1.88678	8.25542	2.20224	8.80301	1.72013	8.54707	2.16058	8.33875	3.80928	9.90413	4.46995	9.77914	3.49978	7.98163	4.66042	8.18995	5.73773	9.63034	5.90438	8.89824	6.60077	9.59462	6.73171	9.30298	6.52934	8.98752	8.94054	2.1906	-0.292282	0.0334919	-0.257976	0.027638	-0.203178	0.0189404	-0.234301	0.0225623	-0.174714
CueL_1	A	F	0.690064	8.4679	0.953224	8.49714	1.41522	8.4679	1.16375	8.49714	1.64329	9.01762	1.65498	7.65503	2.02926	8.29246	1.52633	7.98252	1.98832	7.79538	3.67839	9.36265	4.35676	9.14627	3.29242	7.54392	4.49711	7.60825	5.59069	8.91235	5.75443	8.18135	6.29245	8.77785	6.53222	8.46206	6.30999	8.11702	8.92638	2.18901	-0.291828	0.0199441	-0.262236	0.0222329	-0.210595	0.0172312	-0.238653	0.0214448	-0.182989
CueL_7	A	F	1.15022	8.33476	1.38142	8.36944	1.80336	8.34632	1.60684	8.36366	2.04612	8.86652	2.02878	7.65272	2.38714	8.1787	1.92474	7.90126	2.41026	7.7452	3.80324	9.17286	4.51996	8.99946	3.57782	7.4562	4.56042	7.50244	5.79734	8.76248	5.8956	8.06888	6.50828	8.65844	6.6181	8.35788	6.43314	8.06888	8.39416	2.12754	-0.289157	0.0181236	-0.261478	0.0212955	-0.211327	0.0167973	-0.234659	0.0196747	-0.180266
CueL_10	A	F	0.522977	8.3274	0.798833	8.31016	1.24135	8.28717	1.01147	8.31016	1.50571	8.88486	1.51146	7.49409	1.95973	8.05155	1.41951	7.73546	1.99421	7.59179	3.48843	9.24692	4.29301	9.04003	3.33901	7.35041	4.27577	7.39639	5.60332	8.78716	5.78723	8.00557	6.35618	8.68372	6.5171	8.3389	6.31021	7.99982	9.19039	2.21816	-0.292508	0.025604	-0.262601	0.0223784	-0.214603	0.0177103	-0.239483	0.0213358	-0.182933
CueL_12	A	F	1.54278	8.27959	1.77134	8.29101	2.15418	8.25102	1.94276	8.25673	2.42274	8.72528	2.42274	7.54248	2.68558	8.05103	2.23417	7.86818	2.73129	7.68533	3.98837	8.9367	4.65691	8.8167	3.94837	7.5082	4.65691	7.55391	5.64543	8.62243	5.87971	8.05103	6.33683	8.54814	6.43968	8.29673	6.29683	8.01103	7.49508	2.01425	-0.295677	0.0259593	-0.265126	0.0261355	-0.214309	0.0185485	-0.242468	0.0205567	-0.175708
CueL_14	A	F	1.21958	8.38678	1.4161	8.381	1.82648	8.36944	1.61262	8.36944	2.08658	8.86652	2.08658	7.67006	2.38714	8.19604	1.94786	7.92438	2.37558	7.77988	3.77434	9.16708	4.40436	9.02836	3.56626	7.514	4.46216	7.5718	5.49678	8.8145	5.65284	8.17292	6.07478	8.74514	6.24818	8.4677	6.08634	8.19026	7.7612	2.04914	-0.290971	0.025604	-0.265716	0.0234749	-0.212988	0.0190928	-0.240509	0.0206016	-0.176013
CueL_16	A	F	0.358802	8.58772	0.67643	8.59948	1.15875	8.58184	0.894064	8.58772	1.47638	9.08181	1.49403	7.59954	1.81754	8.3995	1.28228	7.94658	1.83518	7.78189	3.74683	9.46414	4.65266	9.27591	3.30568	7.44661	4.54679	7.52896	5.87024	9.04652	6.0114	8.22304	6.5996	8.92299	6.79371	8.56419	6.56431	8.20539	9.9178	2.29433	-0.294358	0.0251156	-0.262281	0.0252369	-0.213693	0.0218404	-0.240368	0.0233213	-0.179989
CueL_17	A	F	0.941528	8.47375	1.17545	8.4913	1.56142	8.4796	1.35089	8.47375	1.85966	8.94159	1.84797	7.74275	2.08774	8.31586	1.61405	8.0293	2.07604	7.8831	3.40354	9.16382	3.99418	9.03516	3.2047	7.67842	4.07021	7.70182	5.13454	8.82463	5.24566	8.21059	5.78367	8.74861	5.91233	8.47375	5.73689	8.21644	7.56817	2.02395	-0.293455	0.0228525	-0.262472	0.024034	-0.211551	0.0206165	-0.239385	0.0208664	-0.169924
Finca1_2	A	F	1.82458	8.52054	2.0468	8.52638	2.43277	8.52054	2.21639	8.51469	2.6316	8.97083	2.6316	7.83047	2.94739	8.32755	2.54388	8.09948	2.98833	7.8948	4.28658	9.24569	4.84214	9.09949	4.03512	7.70766	4.81875	7.74275	5.88309	8.88896	5.92987	8.25738	6.46789	8.76615	6.5673	8.50299	6.4328	8.23983	7.28669	1.98605	-0.294352	0.0234967	-0.263838	0.0232194	-0.210921	0.020542	-0.24063	0.0207915	-0.181458
Finca1_5	A	F	0.866286	8.48263	1.09885	8.45356	1.50001	8.4303	1.29071	8.44774	1.77327	9.00007	1.7849	7.6396	2.16281	8.20937	1.62792	7.93611	2.20351	7.70936	3.88957	9.44775	4.60469	9.26752	3.5698	7.43029	4.53492	7.45355	6.01168	8.83728	6.09307	8.04658	6.7268	8.68612	6.80819	8.32565	6.61633	8.01169	9.31883	2.23204	-0.283428	0.0222274	-0.258506	0.0186616	-0.215474	0.0153902	-0.237916	0.0176662	-0.185039
Finca1_6	A	F	1.4425	8.47108	1.70111	8.46533	2.09191	8.45958	1.87352	8.44809	2.28156	8.89636	2.28731	7.74696	2.66086	8.28143	2.19535	8.02856	2.71833	7.8619	3.96543	9.17221	4.5114	9.06877	3.72406	7.62627	4.52289	7.63776	5.63781	8.79866	5.70102	8.17798	6.30446	8.7067	6.40791	8.45384	6.21251	8.18373	7.5228	2.01794	-0.296795	0.0248983	-0.262459	0.0229587	-0.21056	0.0204169	-0.239628	0.0198839	-0.183373
Finca1_7	A	F	0.885038	8.51705	1.12067	8.48832	1.47698	8.48832	1.28733	8.49407	1.71835	8.95383	1.71835	7.68949	2.06892	8.26993	1.58617	8.01132	2.12064	7.76994	3.50567	9.2929	4.14933	9.14922	3.39073	7.51708	4.24703	7.51708	5.51712	8.89636	5.61482	8.13775	6.25848	8.73544	6.39066	8.38487	6.18377	8.06879	8.49693	2.1397	-0.282725	0.0262448	-0.255072	0.0221683	-0.213127	0.0211114	-0.235435	0.0223498	-0.183339
Finca1_11	A	F	0.836264	8.41527	1.05849	8.43866	1.46785	8.43866	1.23393	8.44451	1.65498	8.90066	1.64329	7.53222	2.07019	8.27492	1.53802	7.91819	2.16376	7.69012	3.75442	9.40943	4.43278	9.23984	3.45617	7.42111	4.53805	7.52638	5.80706	8.94159	5.91233	8.18135	6.50882	8.77785	6.61409	8.42697	6.36847	8.10533	9.08218	2.20631	-0.280959	0.0212287	-0.25637	0.022695	-0.211305	0.0206557	-0.237024	0.0224635	-0.188398
Finca1_14	A	F	0.988484	8.43085	1.23561	8.40786	1.64364	8.40786	1.43675	8.40786	1.97697	8.9021	1.99421	7.51708	2.22409	8.12051	1.69537	7.89638	2.22409	7.64351	3.78727	9.1952	4.43668	9.01704	3.62061	7.28145	4.53438	7.29869	5.80447	8.7182	5.90217	7.9481	6.49411	8.6205	6.64928	8.28717	6.46537	7.97109	8.74412	2.16838	-0.287687	0.0280993	-0.259451	0.0250116	-0.212765	0.0242479	-0.236438	0.0246352	-0.173717
Finca1_20	A	F	1.35252	8.57752	1.57216	8.57752	1.97676	8.5544	1.75712	8.56596	2.23686	9.02258	2.23686	7.78566	2.53742	8.34632	2.09814	8.0631	2.57788	7.87814	3.98242	9.2769	4.60088	9.15552	3.76278	7.59492	4.80896	7.6585	5.86092	8.90698	5.88404	8.19026	6.58342	8.79716	6.68168	8.50238	6.47938	8.20182	8.18716	2.10257	-0.288864	0.0262488	-0.262035	0.0255386	-0.212694	0.0214066	-0.239482	0.0235287	-0.179415
Finca1_25	A	F	1.9363	8.68156	2.14438	8.6411	2.56632	8.61798	2.34668	8.62376	2.7455	9.05726	2.7455	7.93016	3.10386	8.4099	2.67036	8.2076	3.13854	7.99374	4.38124	9.26534	4.9997	9.1324	4.15004	7.78566	4.91878	7.80878	5.9823	8.92432	6.08056	8.30586	6.62388	8.86074	6.75104	8.60064	6.60654	8.31164	7.32822	1.99173	-0.295327	0.0309381	-0.267071	0.0247127	-0.209582	0.0201246	-0.239529	0.0216598	-0.18364
Finca_7	A	F	1.24698	8.28774	1.48226	8.27009	1.88812	8.27009	1.68225	8.27009	2.09987	8.6936	2.09399	7.49955	2.40574	8.0701	1.9293	7.79365	2.42927	7.61719	3.72331	8.92888	4.38209	8.79359	3.44685	7.32897	4.34092	7.38191	5.44085	8.59948	5.5879	7.96423	6.19963	8.60537	6.32903	8.28774	6.11728	7.99364	7.7183	2.04359	-0.289918	0.0288396	-0.259522	0.0254356	-0.206953	0.0235004	-0.233619	0.0244821	-0.177506
Finca_8	A	F	1.47234	8.26733	1.66124	8.2451	2.07794	8.2451	1.87793	8.25622	2.3113	8.70625	2.29463	7.49504	2.5502	8.06731	2.15017	7.78951	2.69466	7.60061	3.95587	8.96738	4.50036	8.81182	3.72252	7.42282	4.53925	7.46726	5.58934	8.58402	5.62823	7.97286	6.17827	8.51735	6.27272	8.26177	6.12271	7.97286	7.39602	2.00094	-0.29293	0.0275439	-0.26751	0.023558	-0.211198	0.0213853	-0.238171	0.0239292	-0.177259
Finca_16	A	F	1.33722	8.40704	1.56397	8.41286	1.93025	8.41286	1.7442	8.40704	2.16281	8.87216	2.16862	7.65704	2.47676	8.20355	1.97676	7.91285	2.64537	7.7675	3.88957	9.17449	4.49422	9.02333	3.75003	7.4768	4.58143	7.5175	5.75005	8.7617	5.88377	8.08727	6.51749	8.62216	6.59889	8.35472	6.44191	8.03495	8.11668	2.09392	-0.285987	0.0231717	-0.258026	0.0231102	-0.212895	0.0218521	-0.235839	0.0217754	-0.182668
Finca_17	A	F	1.10466	8.58146	1.3721	8.58146	1.81397	8.56402	1.57559	8.57565	2.09885	9.02333	2.08723	7.57564	2.43607	8.31402	1.83141	8.02332	2.45932	7.75588	3.98259	9.31984	4.72678	9.17449	3.79654	7.41866	4.6919	7.4768	5.97679	8.91286	6.08726	8.12216	6.66866	8.79077	6.82564	8.48263	6.65703	8.15123	8.82709	2.17782	-0.290986	0.0295009	-0.260679	0.0288039	-0.210658	0.025675	-0.237636	0.027614	-0.177183
Maxa_2	A	F	1.67443	8.75007	1.90118	8.74426	2.3663	8.72681	2.1163	8.73844	2.59886	9.18612	2.58723	7.97681	2.91281	8.50588	2.44769	8.23844	2.98258	8.06983	4.22678	9.43612	4.81981	9.27914	4.05236	7.85471	4.91283	7.86634	6.0233	9.01751	6.13377	8.38379	6.58145	8.91868	6.77331	8.62216	6.6047	8.33146	7.73544	2.04581	-0.29819	0.0265823	-0.268889	0.0252341	-0.208809	0.0217544	-0.241096	0.0239158	-0.177534
Maxa_3	A	F	1.40345	8.54005	1.61937	8.54573	2.03416	8.51164	1.79551	8.51732	2.25007	8.96051	2.25007	7.80707	2.52849	8.32981	2.13075	8.06276	2.54554	7.88093	3.95467	9.12529	4.52287	8.97756	3.60239	7.59115	4.45469	7.59115	5.65359	8.73892	5.82973	8.13662	6.30702	8.69914	6.43771	8.42072	6.27293	8.11958	7.71524	2.0432	-0.290374	0.0245772	-0.26237	0.0251414	-0.20862	0.0203919	-0.239554	0.0213192	-0.180266
Mimi_5	A	F	1.43606	8.62798	1.68025	8.64542	2.11048	8.62798	1.88374	8.6396	2.30816	9.12798	2.30234	7.90704	2.64537	8.46518	2.16862	8.17448	2.62793	8.00006	3.96515	9.33728	4.6105	9.18031	3.72677	7.69192	4.6105	7.7675	5.72679	8.97682	5.80237	8.3489	6.314	8.91868	6.48842	8.64542	6.27331	8.37216	7.68087	2.03873	-0.29476	0.0235338	-0.262902	0.0247086	-0.20699	0.0205106	-0.236446	0.0230399	-0.179022
Mimi_6	A	F	2.01705	8.28855	2.23175	8.32245	2.58205	8.29985	2.4069	8.3168	2.7233	8.69535	2.71765	7.7631	3.02275	8.17555	2.68375	7.97215	3.0736	7.84785	4.0567	8.86485	4.4974	8.7462	3.9437	7.7179	4.5539	7.7066	5.3562	8.58235	5.4918	8.10775	5.85905	8.54845	5.9777	8.32245	5.84775	8.0795	5.958	1.78474	-0.304784	0.0200696	-0.268538	0.0243046	-0.209929	0.0181504	-0.239196	0.0221748	-0.183561
Mimi_11	A	F	1.76164	8.45937	1.96513	8.4303	2.34304	8.40704	2.14537	8.41867	2.55235	8.88961	2.55816	7.8082	2.81398	8.30821	2.40118	8.0582	2.86049	7.90704	4.04654	9.13961	4.59887	8.99426	3.87794	7.61053	4.70934	7.69774	5.63958	8.80821	5.7733	8.20355	6.29656	8.74426	6.40121	8.46518	6.23261	8.221	7.09355	1.95919	-0.291074	0.0260409	-0.262586	0.020694	-0.209496	0.0150903	-0.237269	0.0179459	-0.177039
Oxo_4	A	F	0.49708	8.62954	0.71672	8.6411	1.15022	8.66422	0.91902	8.65266	1.36408	9.1613	1.36986	7.8608	1.71666	8.5833	1.25426	8.2076	1.77446	8.01686	3.4102	9.54856	4.1038	9.3636	3.1212	7.72786	4.15004	7.79144	5.42742	9.09772	5.50834	8.36944	6.25396	9.00524	6.3869	8.67	6.17882	8.34054	9.08437	2.20656	-0.28324	0.0163751	-0.259009	0.0167718	-0.211202	0.0175854	-0.236696	0.0172362	-0.185679
Oxo_8	A	F	1.58278	8.56529	1.79991	8.58243	2.2456	8.571	1.9999	8.571	2.47416	9.01669	2.46273	7.79961	2.77129	8.42815	2.29703	8.14245	2.78272	7.93675	4.10265	9.25097	4.72548	9.11954	3.93695	7.65105	4.81119	7.76533	5.81685	8.95955	5.9597	8.3253	6.51396	8.87384	6.65681	8.611	6.50825	8.29673	7.73624	2.04592	-0.293385	0.0249522	-0.26524	0.0259545	-0.207738	0.0219922	-0.239473	0.0233631	-0.17573
Oxo_9	A	F	1.43344	8.45036	1.65886	8.47926	2.09236	8.45614	1.86694	8.4677	2.2542	8.94166	2.24264	7.79144	2.67036	8.3232	2.21952	8.0053	2.69348	7.88392	3.97664	9.18442	4.54308	9.00524	3.75122	7.77988	4.67602	7.79722	5.7222	8.82606	5.81468	8.2654	6.4158	8.7856	6.53718	8.50238	6.34066	8.22494	7.72343	2.04426	-0.295244	0.0201711	-0.265896	0.0225817	-0.209937	0.0170409	-0.239039	0.0198623	-0.186128
Oxo_11	A	F	1.37707	8.30244	1.6342	8.31387	2.05133	8.30244	1.80562	8.31387	2.26846	8.84527	2.25703	7.64533	2.6513	8.17673	2.17703	7.87389	2.66844	7.76533	3.97123	9.17668	4.58263	9.03955	3.80552	7.60533	4.60548	7.66247	5.75971	8.8567	5.89113	8.21673	6.45111	8.8167	6.59967	8.51957	6.40539	8.22816	7.91502	2.06876	-0.295319	0.0214071	-0.262811	0.0203312	-0.21037	0.0148106	-0.241213	0.0186538	-0.177703
Oxo_12	A	F	1.05117	8.3639	1.31822	8.38663	1.76142	8.35822	1.51709	8.3639	1.95461	8.86392	1.94893	7.61956	2.3978	8.21617	1.87506	7.87525	2.39212	7.7332	3.67057	9.29007	4.3865	9.1537	3.59102	7.55706	4.52855	7.65365	5.52859	8.96051	5.682	8.27867	6.32975	8.88097	6.44339	8.56846	6.26725	8.25595	8.21278	2.10569	-0.294689	0.0258088	-0.262048	0.0258556	-0.208553	0.0179097	-0.238145	0.0210793	-0.179973
Oxo_16	A	F	1.18024	8.48844	1.40699	8.51751	1.84885	8.50588	1.61048	8.50588	2.09304	8.99426	2.08141	7.72681	2.41862	8.33728	1.94769	8.00006	2.45351	7.86634	3.88375	9.33147	4.50585	9.20356	3.66863	7.61634	4.58143	7.73843	5.7326	9.00589	5.81981	8.35472	6.36052	8.96519	6.51749	8.67449	6.3547	8.35472	8.20619	2.10489	-0.29166	0.0243661	-0.263844	0.0259846	-0.21022	0.0208388	-0.239202	0.0228523	-0.176407
Oxo_22	A	F	0.37141	8.74242	0.662824	8.74242	1.15423	8.73671	0.88567	8.71956	1.47421	9.24525	1.47993	7.71961	1.81705	8.49672	1.20565	8.11959	1.83991	7.86246	3.61696	9.54238	4.34835	9.31953	3.2227	7.54819	4.35407	7.56534	5.72543	9.0624	5.87971	8.31387	6.5711	9.01669	6.75395	8.67957	6.52539	8.30816	9.75807	2.27809	-0.291037	0.027578	-0.261169	0.0268656	-0.210823	0.025077	-0.238386	0.0239789	-0.176788
Oxo_28	A	F	0.3955	8.18685	0.678	8.2151	1.10175	8.20945	0.87575	8.2151	1.2995	8.7123	1.30515	7.41845	1.75715	8.05125	1.24865	7.6727	1.8984	7.52015	3.44085	9.12475	4.11885	8.96655	3.11315	7.232	4.1245	7.3337	5.49745	8.62755	5.55395	7.8874	6.34495	8.41285	6.41275	8.0908	6.2602	7.797	9.26153	2.22587	-0.289637	0.0169897	-0.259048	0.0193169	-0.213289	0.0176228	-0.237686	0.0188107	-0.190637
Oxo_31	A	F	1.85538	8.39256	2.0808	8.38678	2.4854	8.381	2.2831	8.37522	2.63568	8.79138	2.64146	7.64694	3.02872	8.18448	2.53742	7.91282	3.07496	7.72786	4.43904	9.03414	4.97658	8.87808	4.15582	7.47354	4.95346	7.55446	6.03432	8.67	6.11524	8.05154	6.61232	8.56018	6.72792	8.30586	6.58342	8.02842	7.50317	2.01533	-0.294486	0.0262364	-0.264452	0.0248384	-0.21054	0.0229392	-0.237521	0.022734	-0.189359
Pozo_7	A	F	1.53218	8.58486	1.72516	8.58486	2.14037	8.56147	1.91814	8.57902	2.38014	9.0644	2.39183	7.8948	2.6199	8.42112	2.1813	8.1755	2.68423	8.02346	3.90062	9.33341	4.48542	9.20475	3.77781	7.80123	4.47957	7.85386	5.61408	9.02931	5.66671	8.40358	6.24566	8.99422	6.39186	8.71937	6.25736	8.45036	7.41184	2.00308	-0.29004	0.0248677	-0.26404	0.0232106	-0.208319	0.0164949	-0.238098	0.0207655	-0.171707
Pozo_15	A	F	1.7051	8.31742	1.89584	8.34054	2.29466	8.33476	2.0808	8.34054	2.4854	8.82028	2.4854	7.70474	2.7744	8.2076	2.34668	7.94172	2.80908	7.803	4.03444	9.1324	4.5951	8.99368	3.8726	7.56602	4.67602	7.6296	5.65862	8.79138	5.75688	8.1787	6.29442	8.6411	6.38112	8.36944	6.22506	8.10934	7.20661	1.975	-0.290002	0.0183459	-0.263396	0.0202229	-0.208152	0.0166475	-0.237757	0.0189361	-0.178333
Pozo_23	A	F	1.31396	8.53495	1.5349	8.54077	1.95932	8.54658	1.73257	8.54077	2.1163	9.00589	2.12211	7.8082	2.48839	8.36635	2.05816	8.08727	2.55235	7.90123	3.93026	9.42449	4.63957	9.31403	3.80236	7.69192	4.69771	7.77332	5.81981	9.0931	5.86633	8.3489	6.62796	8.91868	6.71517	8.60472	6.54075	8.29076	8.3193	2.11858	-0.285621	0.0217894	-0.259049	0.0209844	-0.208052	0.0187929	-0.235315	0.0196388	-0.186072
Vic_5	A	F	0.459306	8.4303	0.662796	8.45937	1.11047	8.44193	0.889542	8.44774	1.44769	9.00007	1.4535	7.62797	1.69187	8.28495	1.1628	7.93611	1.73839	7.75588	3.31979	9.41287	3.98259	9.25007	3.02328	7.43611	4.04654	7.54657	5.33725	8.97682	5.36051	8.16867	6.11633	8.82565	6.23842	8.49425	6.00005	8.16867	8.91328	2.18754	-0.284848	0.0199596	-0.261867	0.0221584	-0.211759	0.0178756	-0.236504	0.0196764	-0.171056
Vic_6	A	F	0.358802	8.61125	0.652902	8.65242	1.11758	8.63478	0.888182	8.64654	1.39403	9.20533	1.38227	7.72307	1.79989	8.44067	1.23522	8.09363	1.87048	7.86423	3.54685	9.5759	4.29974	9.37003	3.24686	7.60543	4.25269	7.6466	5.5879	9.0524	5.61731	8.24656	6.3408	8.86417	6.51137	8.5289	6.31139	8.19951	9.41267	2.24206	-0.294609	0.0186678	-0.263261	0.0223384	-0.21393	0.0193549	-0.238277	0.021152	-0.183197
Vic_8	A	F	0.55879	8.67007	0.841126	8.68183	1.29992	8.67007	1.05288	8.68183	1.60579	9.17592	1.61755	7.70542	1.94106	8.42891	1.38815	8.08187	1.98223	7.85247	3.8233	9.53472	4.42326	9.37003	3.43509	7.53484	4.58796	7.5819	5.8173	9.04652	5.85259	8.25245	6.55843	8.8877	6.71724	8.58184	6.4702	8.2348	9.48379	2.24958	-0.292066	0.0248114	-0.262255	0.0253669	-0.213891	0.0230126	-0.239919	0.0248523	-0.180408
Vic_17	A	F	2.18561	11.1216	2.58887	11.2426	3.08889	11.2345	2.81468	11.2265	3.35504	11.8878	3.37117	10.2264	3.93572	11.1136	3.34698	10.6619	4.00831	10.4442	5.71002	12.4766	6.55685	12.2991	5.58098	10.2022	7.02461	10.2829	8.18597	12.0007	8.33921	11.0894	9.14571	11.8959	9.31508	11.5329	9.14571	11.1297	10.9064	2.38935	-0.297125	0.016456	-0.259307	0.0242701	-0.213671	0.0195254	-0.238796	0.0209872	-0.18411
Vic_4	A	F	0.293412	8.7305	0.580836	8.80835	1.01197	8.77841	0.77844	8.80236	1.25748	9.37122	1.25149	7.982	1.70658	8.59278	1.18562	8.25146	1.71856	8.06584	3.3413	9.9281	4.08382	9.77242	3.15568	7.72452	4.25747	7.90416	5.65267	9.36523	5.68261	8.5329	6.46704	9.1317	6.6347	8.77242	6.36524	8.41314	9.74327	2.27658	-0.285832	0.0140686	-0.255972	0.020725	-0.211856	0.0156746	-0.235715	0.0192024	-0.183936
Aga_8	A	M	1.76142	8.51732	1.9887	8.52868	2.38076	8.51732	2.17621	8.523	2.53985	8.97756	2.55122	7.85821	2.89782	8.40936	2.45462	8.11958	2.90918	7.96048	4.00013	9.23325	4.52287	9.0912	3.98308	7.76729	4.52287	7.78434	5.5229	8.91506	5.6195	8.32413	6.08542	8.81846	6.19906	8.55709	6.03997	8.31277	6.73601	1.90747	-0.299908	0.0244515	-0.266108	0.0244065	-0.208047	0.0197368	-0.238341	0.0221365	-0.18094
Aga_14	A	M	1.75283	8.75268	1.97697	8.74693	2.34478	8.75268	2.16662	8.75843	2.5919	9.13198	2.59764	8.01707	2.84477	8.55154	2.40225	8.3274	2.91948	8.17223	4.04014	9.36761	4.61484	9.1952	3.83325	7.91937	4.52864	7.91937	5.54011	8.97681	5.56884	8.40786	6.19527	8.86762	6.27572	8.60326	6.10331	8.3389	6.82589	1.92072	-0.299037	0.0244247	-0.266192	0.0233517	-0.212284	0.0238108	-0.238389	0.0248378	-0.175679
Cha_2	A	M	1.58849	8.23959	1.80562	8.2453	2.23989	8.23959	2.01704	8.2453	2.39417	8.69099	2.39988	7.57676	2.72558	8.11959	2.29703	7.84532	2.74272	7.70819	3.9998	8.93098	4.58834	8.78813	3.7541	7.41677	4.49692	7.48534	5.54258	8.59957	5.74257	8.02817	6.18255	8.50243	6.2854	8.26244	6.13112	8.00531	7.16866	1.96972	-0.296612	0.0217224	-0.266304	0.0213966	-0.205786	0.0183548	-0.236827	0.0203034	-0.181937
Cha_14	A	M	1.5317	8.27118	1.72244	8.31742	2.11548	8.30586	1.9363	8.31742	2.33512	8.77404	2.34668	7.61804	2.6877	8.18448	2.1964	7.8897	2.71082	7.7452	3.96508	9.03992	4.58932	8.89542	3.75122	7.4851	4.60088	7.57758	5.67018	8.73358	5.78	8.13246	6.36956	8.68156	6.51406	8.42146	6.33488	8.14402	7.59434	2.0274	-0.289058	0.0188879	-0.263629	0.0235477	-0.212032	0.0191053	-0.235509	0.0219574	-0.17967
Cha_20	A	M	1.53748	8.25962	1.73978	8.25384	2.16172	8.20182	1.9363	8.21338	2.35246	8.68734	2.34668	7.58336	2.63568	8.04576	2.2253	7.82034	2.64724	7.63538	3.94774	8.94166	4.51996	8.80872	3.80324	7.45042	4.53152	7.50244	5.52568	8.67	5.6933	8.08622	6.24818	8.6411	6.35222	8.41568	6.21928	8.11512	7.36424	1.99664	-0.291084	0.0296783	-0.263715	0.0270557	-0.207007	0.016171	-0.23745	0.0197876	-0.176738
Cha_36	A	M	0.64218	12.4399	1.23849	12.4858	1.8348	12.4583	1.54123	12.495	2.23846	13.3482	2.2568	11.0822	3.05494	12.2014	2.31185	11.5592	3.05494	11.3024	5.35762	13.9628	6.53189	13.6968	4.99983	10.8804	6.78876	10.9446	8.78869	13.4491	9.10978	12.2014	10.174	13.4766	10.5134	12.9904	10.2841	12.3299	14.9283	2.70326	-0.293574	0.0268567	-0.253494	0.0265875	-0.213804	0.0214175	-0.233216	0.025507	-0.181869
CueR_3	A	M	1.03545	13.8503	1.47795	13.8768	2.0532	13.8857	1.81425	13.8768	2.4603	14.7795	2.46915	12.7086	3.12405	13.7529	2.3541	13.2661	3.0975	12.9033	5.3808	15.4344	6.6552	15.2132	5.0622	12.7263	6.549	12.7352	8.50485	14.8857	8.62875	13.6644	9.86775	14.6822	10.1598	14.0981	9.74385	13.5936	13.773	2.62271	-0.289405	0.0162595	-0.257191	0.0161006	-0.215426	0.0140308	-0.232807	0.0145167	-0.181704
CueR_4	A	M	1.62615	13.5571	2.11313	13.6266	2.62619	13.6005	2.34792	13.6092	3.00012	14.3745	2.99142	12.4527	3.58275	13.3744	2.95664	12.8875	3.55666	12.6266	5.81762	14.8702	6.75679	14.6267	5.40891	12.1657	6.89593	12.3483	8.67861	14.2788	8.85253	13.2527	9.81778	14.2093	10.0091	13.7136	9.68734	13.2614	12.764	2.54663	-0.293018	0.0199694	-0.254634	0.0234906	-0.214581	0.0194242	-0.236326	0.021203	-0.182264
CueR_6	A	M	0.991554	12.991	1.36129	13.0415	1.86547	13.0331	1.61338	13.0415	2.20159	13.8061	2.20999	11.9827	2.84862	12.8734	2.18478	12.3104	2.93265	12.0751	4.90735	14.68	5.93252	14.5372	4.86534	11.8314	6.26023	12.0583	8.04167	14.3187	8.28536	13.2263	9.34414	14.117	9.55421	13.6129	9.12566	13.1759	13.193	2.57968	-0.28043	0.0216607	-0.25212	0.0220942	-0.214211	0.0168786	-0.233129	0.0198025	-0.181872
CueR_11	A	M	1.28693	12.8119	1.83613	12.8283	2.40172	12.8037	2.10663	12.8447	2.68042	13.6726	2.68042	11.8529	3.38536	12.6398	2.86075	12.1725	3.44274	11.9348	5.16411	14.2054	6.15595	14.0169	5.13952	11.607	6.65596	11.9512	7.94289	13.73	8.04126	12.7955	8.94293	13.7464	9.20523	13.3119	8.89374	12.8365	11.8317	2.47078	-0.307392	0.026975	-0.261067	0.0234891	-0.213703	0.01641	-0.238166	0.022468	-0.182554
CueR_12	A	M	0.695357	11.9617	1.13288	12.1102	1.63292	12.0945	1.35165	12.1102	1.99232	12.9383	1.99232	11.071	2.61735	11.9226	2.03138	11.4148	2.64861	11.2117	4.53154	13.5477	5.4691	13.3837	4.32059	10.8835	5.81287	11.1648	7.48485	13.0633	7.59424	12.0086	8.71931	12.8446	8.85213	12.3836	8.52398	11.9305	12.3996	2.51767	-0.290963	0.0123377	-0.254767	0.0212829	-0.214642	0.0166232	-0.237163	0.0197929	-0.179999
CueR_13	A	M	2.18723	10.2974	2.40014	10.349	2.78726	10.349	2.60016	10.3684	2.88404	10.82	2.8905	9.79414	3.25181	10.2522	2.85824	9.98124	3.30342	9.92318	4.45188	11.2136	5.00675	11.1555	4.26477	9.8393	5.03256	9.87156	6.09069	11.1362	6.31006	10.5555	6.78105	11.2071	7.00687	10.9813	6.81976	10.6523	7.3374	1.99298	-0.285309	0.0194111	-0.25549	0.0217867	-0.203318	0.0134845	-0.228126	0.0200991	-0.180135
CueR_20	A	M	2.20177	14.5878	2.55265	14.5966	3.00002	14.5878	2.74564	14.5878	3.25441	15.1317	3.26318	13.5615	3.80705	14.3598	3.2281	13.9212	3.77196	13.7194	5.67548	15.4914	6.63163	15.2808	5.3246	13.3247	6.64918	13.3948	8.31586	15.0001	8.3948	14.1141	9.2106	14.9475	9.52639	14.5527	9.31586	14.158	11.1694	2.41318	-0.284357	0.0239458	-0.252908	0.0238798	-0.21285	0.0220062	-0.235637	0.0226252	-0.188739
CueR_23	A	M	0.900018	11.2717	1.33574	11.2645	1.80004	11.2717	1.57146	11.2645	2.03575	11.9788	2.02147	10.4216	2.63577	11.0788	2.0929	10.7216	2.63577	10.5145	4.35009	12.4431	5.20725	12.3288	4.17866	10.1645	5.44297	10.4002	6.88585	12.1002	6.98585	11.1645	7.99302	11.9288	8.12873	11.5288	7.89302	11.1217	10.92	2.3906	-0.293867	0.0224058	-0.254118	0.0186679	-0.211641	0.0160268	-0.23258	0.0169963	-0.185088
CueL_11	A	M	0.834244	8.21102	1.05138	8.21673	1.46278	8.18816	1.24565	8.19388	1.63992	8.62243	1.62849	7.51962	1.91419	8.0396	1.50278	7.7539	1.9599	7.65105	3.17127	8.86813	3.74838	8.73671	3.05128	7.42249	3.73124	7.3882	4.74262	8.571	4.92547	7.99389	5.45687	8.531	5.58258	8.27959	5.39402	7.97674	7.19836	1.97385	-0.292606	0.0268714	-0.262429	0.0261976	-0.205524	0.0194543	-0.23562	0.0217142	-0.178003
CueL_18	A	M	1.16089	8.37338	1.39077	8.36188	1.77582	8.3389	1.56318	8.3389	2.04593	8.79291	2.05168	7.54006	2.31604	8.11476	1.79881	7.90212	2.25857	7.68949	3.71256	8.99405	4.32174	8.79866	3.48268	7.32742	4.28151	7.30444	5.44816	8.63199	5.6608	7.99408	6.09182	8.6205	6.25848	8.35039	6.10331	8.0458	7.85781	2.06151	-0.288248	0.0299898	-0.259005	0.0277834	-0.210048	0.0236074	-0.237123	0.0242997	-0.17419
CueL_19	A	M	0.06358	8.2943	0.41038	8.24806	0.89012	8.19026	0.65314	8.21916	1.20802	8.8723	1.2138	7.30592	1.64152	7.98218	1.13866	7.57758	1.62996	7.3695	3.4969	9.28268	4.31188	9.05148	3.16744	7.16142	4.15582	7.1383	5.7511	8.75092	5.90138	7.79722	6.647	8.6411	6.83774	8.2076	6.5892	7.79144	10.3004	2.33218	-0.293652	0.0278987	-0.260133	0.0223292	-0.213743	0.0152204	-0.236658	0.0187658	-0.180753
Finca1_4	A	M	1.67812	8.4366	1.908	8.44809	2.27007	8.43085	2.07467	8.4366	2.53443	8.9136	2.55742	7.71822	2.80454	8.26419	2.37351	8.02856	2.86201	7.82741	4.15508	9.22968	4.77001	9.12049	3.95394	7.5688	4.85047	7.62052	5.99987	8.86187	6.06883	8.17798	6.71824	8.70096	6.79295	8.41361	6.55733	8.13775	7.83956	2.05918	-0.28812	0.0212059	-0.258749	0.0216126	-0.212655	0.0177471	-0.237547	0.0193798	-0.176725
Finca1_23	A	M	1.83226	8.51394	2.06346	8.51394	2.42182	8.4966	2.23108	8.50816	2.73394	8.97056	2.72816	7.75098	2.9767	8.31164	2.55476	8.07466	2.97092	7.8897	4.2483	9.14974	4.84364	9.00524	4.08068	7.67584	4.81474	7.69318	5.90716	8.80872	6.04588	8.2076	6.49672	8.6989	6.64122	8.44458	6.45048	8.19026	7.30891	1.98909	-0.296439	0.0253438	-0.264807	0.0245439	-0.215839	0.0209314	-0.241894	0.0231729	-0.171504
Finca_1	A	M	0.672399	8.48257	0.86205	8.44809	1.28733	8.43085	1.06319	8.44234	1.50571	8.89061	1.51146	7.61477	1.89076	8.25269	1.32756	7.87339	1.94823	7.71822	3.42521	9.1952	4.09186	9.01704	3.27004	7.51133	4.10336	7.54581	5.24126	8.78142	5.37345	8.12626	5.99987	8.70096	6.1378	8.40211	5.98263	8.09178	8.46005	2.13535	-0.285567	0.0298833	-0.263273	0.0250958	-0.213075	0.0214537	-0.239522	0.0236575	-0.185527
Finca_2	A	M	0.729869	8.48832	0.959749	8.49981	1.3448	8.47682	1.13791	8.49981	1.64939	8.98256	1.65514	7.72971	1.89651	8.32166	1.431	8.07453	1.908	7.89063	3.20108	9.29865	3.8275	9.13198	3.04591	7.69523	3.77003	7.68949	4.98265	8.89636	5.06311	8.23545	5.67804	8.75843	5.80447	8.45958	5.58034	8.16074	7.6958	2.04067	-0.292182	0.0208416	-0.262257	0.0213118	-0.212329	0.0166133	-0.239108	0.0205183	-0.170515
Finca_3	A	M	0.775845	8.50556	0.948255	8.5228	1.32181	8.5228	1.13216	8.5228	1.59767	8.90785	1.60916	7.64351	1.81605	8.26419	1.3333	8.02856	1.9195	7.81017	3.31027	9.18371	4.10336	9.01704	3.17809	7.55156	3.95968	7.54006	5.09759	8.83314	5.16655	8.1435	5.72976	8.75268	5.87918	8.44809	5.70102	8.13775	7.95868	2.07426	-0.283203	0.0263631	-0.261452	0.0279871	-0.214484	0.0268129	-0.238331	0.0274091	-0.178608
Finca_5	A	M	1.23838	8.19193	1.43606	8.1803	1.79653	8.16286	1.60466	8.17448	2.02909	8.6396	2.01746	7.48262	2.30816	7.98262	1.84885	7.73262	2.34886	7.57564	3.63375	8.91286	4.2791	8.83147	3.45933	7.26169	4.23259	7.3489	5.37214	8.59891	5.50004	7.91867	6.06982	8.44774	6.16865	8.17448	5.98261	7.89541	7.62448	2.03136	-0.283799	0.0248696	-0.257934	0.0223686	-0.210758	0.0182988	-0.235856	0.0207721	-0.17791
Finca_11	A	M	1.31206	7.76254	1.52592	7.73364	1.91318	7.7163	1.7051	7.72208	2.17906	8.23072	2.1964	6.936	2.47384	7.46198	2.023	7.26546	2.53742	6.98802	4.00554	8.60642	4.66446	8.46192	3.79168	6.75682	4.624	6.81462	6.02276	8.1787	6.06322	7.40996	6.62388	8.05154	6.78572	7.71052	6.62966	7.38106	8.51332	2.14163	-0.28297	0.0269748	-0.257968	0.0226613	-0.212556	0.0189526	-0.236971	0.0205303	-0.179111
Finca_15	A	M	1.78157	8.63199	1.99996	8.63774	2.40225	8.63774	2.18386	8.63774	2.65511	9.0113	2.65511	7.77569	2.8735	8.35614	2.40799	8.15499	2.91373	7.94235	4.22405	9.20095	4.85047	9.04003	3.95394	7.62052	4.70105	7.68374	5.9424	8.78716	6.05159	8.17223	6.56307	8.68372	6.68951	8.40786	6.5171	8.132	7.51782	2.01728	-0.290791	0.0261758	-0.261728	0.0271765	-0.208193	0.0276092	-0.237254	0.0273742	-0.174949
Mar_1	A	M	2.0172	8.16074	2.26432	8.20097	2.64362	8.18947	2.45397	8.18373	2.83902	8.61475	2.84477	7.50558	3.12637	8.03431	2.72982	7.77569	3.12062	7.60903	4.34473	8.86187	4.88495	8.73544	4.16083	7.3734	4.8907	7.41938	5.91366	8.59177	6.05734	7.99982	6.5056	8.52855	6.64353	8.28717	6.5056	8.00557	7.02884	1.95002	-0.296706	0.0232002	-0.261275	0.0269332	-0.20748	0.0222604	-0.23447	0.0229645	-0.17631
Mar_12	A	M	1.70686	8.07453	1.91375	8.07453	2.32179	8.07453	2.12639	8.06304	2.50569	8.51131	2.49994	7.37915	2.86201	7.93661	2.44247	7.66075	2.94821	7.49409	4.18382	8.79866	4.77576	8.66648	4.01715	7.2872	4.81024	7.35616	5.90792	8.44809	6.00561	7.84466	6.51135	8.40786	6.66652	8.12626	6.49411	7.83316	7.56499	2.02353	-0.292845	0.0233754	-0.26552	0.0220897	-0.211635	0.019553	-0.237511	0.0192503	-0.184633
Mimi_1	A	M	1.85134	8.59386	2.08561	8.60528	2.47416	8.59386	2.26846	8.60528	2.77129	9.09097	2.77129	7.90818	2.95414	8.48529	2.54844	8.23387	2.97699	8.02246	4.17693	9.29668	4.76548	9.17668	4.10837	7.77675	4.75976	7.79961	5.91399	8.95384	5.97113	8.37101	6.47396	8.86241	6.66252	8.611	6.4911	8.31958	7.25142	1.9812	-0.296114	0.021136	-0.26375	0.0215623	-0.210229	0.0180809	-0.238537	0.0206646	-0.166833
Mimi_2	A	M	1.98832	8.71352	2.23394	8.70182	2.65499	8.67843	2.42692	8.68428	2.88891	9.14627	2.88306	7.94743	3.16962	8.46206	2.72517	8.25153	3.16962	8.05854	4.42694	9.31002	5.00589	9.14627	4.2281	7.79538	4.90647	7.80123	6.07022	8.88896	6.1521	8.30416	6.71935	8.83633	6.84801	8.6141	6.67257	8.32755	7.31599	1.99006	-0.298885	0.0271682	-0.265318	0.0252275	-0.207786	0.021442	-0.238958	0.0225602	-0.175151
Mimi_4	A	M	1.4285	8.531	1.67992	8.54814	2.12561	8.52529	1.88562	8.53672	2.37131	9.02241	2.37702	7.76533	2.70272	8.37101	2.21703	8.07388	2.66844	7.87961	4.0798	9.1824	4.73119	9.00526	3.9198	7.56534	4.70262	7.58248	5.87399	8.77099	6.00541	8.11959	6.58824	8.66814	6.75395	8.35387	6.51967	8.06245	8.0277	2.0829	-0.297046	0.0210531	-0.265718	0.0231533	-0.210193	0.020244	-0.240091	0.021701	-0.179512
Mimi_7	A	M	1.8785	8.381	2.08658	8.38678	2.47962	8.37522	2.2831	8.381	2.67036	8.82028	2.67036	7.75676	2.91312	8.24806	2.5432	8.01686	2.95936	7.83768	4.11536	9.00524	4.63556	8.88964	3.9593	7.60648	4.624	7.65272	5.71064	8.66422	5.76266	8.09778	6.2713	8.50816	6.38112	8.28852	6.2424	8.04576	6.83842	1.92256	-0.295325	0.0197954	-0.264876	0.0201883	-0.20742	0.017643	-0.236149	0.0189157	-0.178555
Mimi_13	A	M	1.76868	8.4677	1.9652	8.48504	2.31778	8.4677	2.13282	8.47348	2.49118	8.92432	2.49118	7.85502	2.80908	8.3232	2.47962	8.09778	2.8611	7.94172	4.05178	9.1902	4.57198	9.0746	3.93618	7.77988	4.57776	7.75676	5.65284	8.83762	5.79156	8.27118	6.28286	8.73358	6.42158	8.48504	6.23084	8.23072	7.08886	1.95852	-0.289497	0.019789	-0.261684	0.021107	-0.212068	0.0166429	-0.238115	0.0185174	-0.185001
Mimi_14	A	M	1.83329	8.27568	2.0057	8.3274	2.42523	8.31591	2.20685	8.31591	2.65511	8.84463	2.66661	7.68374	2.91373	8.2297	2.4942	7.91937	2.96545	7.81017	4.10336	9.10325	4.6953	8.99405	4.06313	7.63202	4.77001	7.67799	5.79298	8.78716	5.86194	8.15499	6.35618	8.64923	6.47112	8.38487	6.31021	8.12626	7.11147	1.96171	-0.29344	0.0149691	-0.268792	0.0208181	-0.209972	0.0157759	-0.24064	0.0175611	-0.17337
Oxo_7	A	M	1.85538	8.5255	2.0808	8.53128	2.46806	8.51394	2.26576	8.53706	2.6299	8.94744	2.65302	7.85502	2.97092	8.381	2.49118	8.1209	2.98248	7.95906	4.13848	9.23066	4.67602	9.10928	3.99976	7.7452	4.76272	7.82034	5.72798	8.91854	5.82046	8.3232	6.32332	8.84918	6.4447	8.57752	6.29442	8.31742	6.99494	1.94519	-0.29448	0.02505	-0.262251	0.0241776	-0.207091	0.0187855	-0.2358	0.0236095	-0.180718
Oxo_10	A	M	0.90746	8.23072	1.19068	8.24228	1.6762	8.24806	1.43344	8.24806	1.86116	8.75092	1.86116	7.47932	2.29466	8.09778	1.7918	7.79144	2.30044	7.59492	3.6703	9.08616	4.26564	8.94744	3.53736	7.40418	4.30032	7.49088	5.48522	8.76826	5.6355	8.10934	6.20194	8.73358	6.31176	8.41568	6.14414	8.10356	8.18909	2.1028	-0.301187	0.0246217	-0.266585	0.0235295	-0.207393	0.0199466	-0.236964	0.02209	-0.180421
Oxo_14	A	M	1.15423	8.18816	1.39993	8.23959	1.85134	8.23387	1.61706	8.25102	2.09132	8.78242	2.08561	7.50248	2.45131	8.08531	1.98276	7.76533	2.50273	7.65676	3.81124	9.11954	4.47406	8.94812	3.73696	7.47963	4.45121	7.4682	5.71971	8.68528	5.79971	8.01103	6.38254	8.54814	6.50825	8.22245	6.33111	7.94246	8.14172	2.097	-0.297132	0.0147234	-0.266688	0.0197158	-0.211304	0.0165965	-0.239972	0.019954	-0.178905
Oxo_21	A	M	1.34674	8.65844	1.62418	8.65844	2.06924	8.64688	1.83226	8.65266	2.32356	9.11506	2.31778	7.8319	2.64724	8.42724	2.17328	8.13824	2.66458	7.9764	4.09802	9.37516	4.75694	9.18442	3.84948	7.7163	4.60666	7.76832	5.83202	8.95322	5.91872	8.31742	6.42736	8.88386	6.56608	8.61798	6.39846	8.2943	7.93392	2.07115	-0.302099	0.0264136	-0.26713	0.025494	-0.211074	0.0225603	-0.240923	0.0240751	-0.177468
Oxo_26	A	M	1.67238	8.35614	1.9195	8.36188	2.28156	8.35039	2.1034	8.36188	2.4942	8.82165	2.49994	7.63202	2.83902	8.21246	2.3965	7.89063	2.88499	7.77569	4.13209	9.0975	4.77576	8.93084	3.99417	7.53432	4.85621	7.5688	5.9309	8.78716	6.10906	8.18373	6.6148	8.72969	6.75847	8.46533	6.58606	8.15499	7.77074	2.05037	-0.290406	0.0249749	-0.258608	0.0239187	-0.212165	0.0198119	-0.234976	0.0225827	-0.181418
Oxo_29	A	M	1.30279	8.23959	1.51421	8.26244	1.89705	8.25673	1.70277	8.26244	2.15418	8.64528	2.17132	7.43963	2.44559	8.07388	1.97704	7.81104	2.48559	7.63962	3.80552	8.96527	4.45692	8.84527	3.73124	7.29106	4.54834	7.4282	5.65686	8.64528	5.82257	8.0396	6.30254	8.59386	6.43968	8.33101	6.29683	8.06245	7.94024	2.07194	-0.28781	0.0261445	-0.26105	0.0275606	-0.212926	0.0242018	-0.237328	0.0262601	-0.177903
Pozo_1	A	M	0.545965	8.61475	0.712628	8.64349	1.03446	8.63199	0.86205	8.63774	1.27583	9.08026	1.26434	8.01707	1.50571	8.49407	1.13216	8.28717	1.56318	8.12626	2.72408	9.35037	3.24706	9.21244	2.51719	7.83891	3.23556	7.8504	4.34473	9.05152	4.45392	8.43085	4.99414	9.02854	5.13207	8.78142	5.00564	8.49981	7.0591	1.95432	-0.280757	0.0197806	-0.256914	0.0225044	-0.211439	0.0182937	-0.235803	0.0204913	-0.173683
Pozo_6	A	M	1.56318	8.47108	1.79306	8.5228	2.17811	8.49981	1.97697	8.51131	2.36202	9.02854	2.36202	7.8619	2.6781	8.36763	2.26432	8.08603	2.78155	7.98258	3.98267	9.33887	4.59185	9.20669	3.86773	7.81017	4.60909	7.84466	5.75275	9.02854	5.87918	8.39062	6.45963	8.94808	6.6033	8.66648	6.4194	8.36763	7.66877	2.03716	-0.289331	0.0168734	-0.258944	0.021515	-0.209044	0.0150327	-0.235116	0.0183521	-0.180314
Pozo_18	A	M	1.95942	8.19604	2.16172	8.23072	2.57788	8.20182	2.36402	8.2076	2.84376	8.6989	2.84376	7.49666	3.10964	8.03998	2.67614	7.7741	3.13276	7.63538	4.35812	8.99368	4.96502	8.88386	4.3061	7.41574	5.06906	7.53712	6.09212	8.76248	6.23662	8.15558	6.77416	8.6989	6.87242	8.44458	6.71058	8.15558	7.53101	2.01903	-0.292391	0.0259007	-0.26522	0.0281167	-0.210506	0.0194182	-0.238729	0.0226886	-0.169511
Pozo_20	A	M	1.5368	8.00605	1.73455	7.99475	2.147	7.9891	1.921	7.9891	2.3278	8.4524	2.32215	7.2998	2.66115	7.8648	2.20915	7.571	2.7233	7.42975	3.9437	8.8027	4.5313	8.67275	3.7968	7.19245	4.52	7.22635	5.7291	8.4524	5.8082	7.8196	6.3506	8.3846	6.48055	8.11905	6.31105	7.8196	7.59403	2.02736	-0.287315	0.0245507	-0.261397	0.0215228	-0.207211	0.0175606	-0.236925	0.0193248	-0.179819
Pozo_24	A	M	1.9887	8.09117	2.25575	8.12526	2.63645	8.1139	2.43758	8.11958	2.81827	8.61959	2.81259	7.5116	3.13646	7.98889	2.72168	7.72752	3.21033	7.63093	4.25014	8.92642	4.79561	8.79574	4.21036	7.47183	4.90357	7.49456	5.86382	8.62528	6.01156	7.98889	6.5968	8.44913	6.68203	8.18776	6.45475	7.94912	7.02972	1.95015	-0.29991	0.0176648	-0.261669	0.0200938	-0.207695	0.015045	-0.235893	0.0176463	-0.1773
Pozo_25	A	M	1.90848	8.30816	2.15418	8.30244	2.58273	8.27959	2.3656	8.29101	2.79986	8.75385	2.79986	7.54819	3.10842	8.11959	2.67415	7.85104	3.1027	7.69676	4.37121	9.03955	4.9369	8.91384	4.2055	7.49677	4.97118	7.54248	6.09684	8.64528	6.22255	8.04531	6.73681	8.51386	6.82252	8.2453	6.69109	7.96532	7.48624	2.01307	-0.297739	0.0246443	-0.264952	0.0227935	-0.207827	0.0178434	-0.236772	0.0203312	-0.17673
Pozo_26	A	M	1.06319	8.13775	1.31032	8.1435	1.7241	8.13775	1.50571	8.13775	1.98272	8.65498	1.97697	7.42512	2.27581	7.93661	1.8218	7.68949	2.30455	7.54006	3.6436	8.94233	4.29876	8.8159	3.50567	7.31018	4.29301	7.35041	5.61482	8.66648	5.74125	7.93086	6.37917	8.56878	6.55158	8.26419	6.32745	7.94235	8.29989	2.11624	-0.288406	0.022598	-0.258619	0.0215721	-0.208857	0.0180029	-0.235141	0.019522	-0.17414
Vic_10	A	M	0.171593	8.69799	0.508862	8.69799	0.982222	8.6684	0.733708	8.67432	1.32541	9.30744	1.32541	7.69802	1.74551	8.39031	1.08873	8.02937	1.79877	7.78085	3.59754	9.73347	4.4555	9.52637	3.15968	7.36667	4.27799	7.46134	5.91108	9.23052	5.99392	8.29563	6.8223	9.02934	6.97023	8.6329	6.72171	8.23055	10.432	2.34488	-0.289772	0.0254267	-0.257437	0.024441	-0.212139	0.0202209	-0.235949	0.0215157	-0.177375
Maxa_4	B	J	2.37211	8.75588	2.59886	8.77914	2.97095	8.78495	2.77909	8.77914	3.15119	9.13961	3.15119	8.18611	3.40119	8.6396	3.04654	8.37216	3.43026	8.32565	4.43608	9.31403	4.88957	9.16868	4.19189	8.11053	4.80236	8.13379	5.69191	9.02914	5.84307	8.55239	6.17447	9.0524	6.25005	8.80821	6.17447	8.58146	5.85554	1.76739	-0.309337	0.0234547	-0.270458	0.025786	-0.2069	0.0240914	-0.239693	0.024485	-0.17357
Aga_1	B	F	1.37564	8.73358	1.6473	8.7278	2.05768	8.71624	1.8496	8.72202	2.2542	9.17286	2.24264	8.04576	2.61256	8.54284	2.17328	8.33476	2.67614	8.13246	3.91306	9.41562	4.55464	9.28268	3.77434	7.86658	4.52574	7.92438	5.68174	9.05148	5.86092	8.4099	6.38112	8.94166	6.4736	8.61798	6.27708	8.3521	7.72167	2.04403	-0.298778	0.0219233	-0.26361	0.02047	-0.210493	0.0179069	-0.237426	0.019196	-0.183854
Cate_1	B	F	1.20792	15.9406	1.82178	15.8218	2.56436	15.7327	2.14852	15.7624	3.22773	16.5149	3.18812	14.0891	3.77228	15.2079	3	14.7822	3.59406	14.3267	6.49506	17.0891	7.9109	16.9307	6.26733	13.9307	8.67328	14.2574	9.79209	16.8713	10.1386	15.5446	10.9208	17.0792	11.4159	16.6238	11.099	15.8416	15.6099	2.74791	-0.301566	0.0503826	-0.263236	0.0384406	-0.216414	0.0274335	-0.242766	0.032315	-0.168506
Cate_4	B	F	1.05316	16.4783	1.69144	16.4144	2.31908	16.3719	2.01058	16.4038	2.84035	17.2761	2.84035	14.8506	3.79777	15.9676	2.90417	15.34	3.91478	15.0421	6.40408	17.8931	7.62745	17.6591	6.31897	14.6698	7.93595	14.6804	9.97844	17.1378	10.1167	15.7123	11.4465	17.0314	11.7869	16.457	11.3188	15.7655	16.0927	2.77836	-0.300609	0.0321382	-0.261141	0.0264284	-0.222255	0.022063	-0.24134	0.0248912	-0.187398
Cate_5	B	F	1.02221	18.122	1.78887	17.9443	2.4222	17.8332	2.1222	17.9109	3.16663	18.5998	3.1333	15.9221	3.82218	17.0332	2.87775	16.7221	3.86663	16.0776	6.88882	19.0665	8.71102	18.7776	7.04437	15.3554	8.65547	15.4887	10.811	18.5887	11.2888	17.0887	12.211	18.8998	12.7999	18.3998	12.8332	17.6443	18.0477	2.89302	-0.297103	0.0523049	-0.255254	0.0397608	-0.220396	0.0313399	-0.236836	0.0367155	-0.176411
Cate_6	B	F	1.24	15.76	1.74	15.75	2.36	15.73	2.05	15.74	3.01	16.61	2.99	14.04	3.69	15.37	2.88	14.84	3.56	14.37	6.87	17.13	8.49	16.71	6.19	13.8	8.83	13.87	10.7	16.13	11.14	14.72	11.76	16.01	12.19	15.45	11.73	14.77	17.0998	2.83907	-0.29003	0.0230042	-0.260713	0.0223571	-0.224331	0.0210974	-0.242527	0.0217276	-0.186164
Cate_7	B	F	1.42729	13.9274	2.07275	13.9456	2.67275	13.9092	2.3273	13.9365	3.04549	14.7547	3.04549	12.7729	3.69095	13.6547	3.07276	13.191	3.79095	12.9274	5.84551	15.3638	7.2728	15.2365	5.67278	12.7001	7.30916	12.9092	8.91827	15.0456	9.30918	14.0274	10.0274	15.0092	10.4183	14.5456	10.091	14.0274	13.4793	2.60116	-0.305114	0.0291434	-0.257364	0.0251684	-0.213395	0.0175443	-0.238655	0.0224006	-0.178934
Cate_8	B	F	0.710391	10.4076	1.1449	10.3662	1.68287	10.311	1.41389	10.3386	1.92426	10.9386	1.91047	9.24198	2.44154	10.0627	1.8346	9.71098	2.37257	9.4351	4.23476	11.4352	5.32448	11.3594	4.46926	9.24888	5.43484	9.34544	6.86941	11.2214	7.03494	10.311	7.64188	11.0766	7.94534	10.649	7.67636	10.2351	11.0474	2.40219	-0.296316	0.0362136	-0.25748	0.0287984	-0.209415	0.0192559	-0.23345	0.0240273	-0.182292
Cate_10	B	F	1.38943	16.5469	1.88415	16.5574	2.43151	16.5048	2.12625	16.5258	2.94728	17.389	2.93675	14.968	3.642	16.1258	2.97886	15.5574	3.67357	15.0311	6.42086	17.8416	7.82082	17.4521	5.75772	14.3785	7.8524	14.4522	9.93654	17.0732	10.3681	15.6943	11.2102	17.1469	11.6418	16.6521	11.3049	15.9258	15.8509	2.76323	-0.284601	0.029807	-0.253338	0.0295176	-0.218842	0.0251404	-0.238092	0.0270584	-0.184582
Cate_11	B	F	1.37495	14.8456	1.84608	14.8648	2.52874	14.8648	2.16337	14.8648	2.98065	15.8167	2.99988	13.586	3.78831	14.7302	3.08642	14.0571	3.88446	13.8552	6.11514	16.6916	7.51893	16.4513	6.00938	13.5572	7.60546	13.7975	9.64385	15.9897	9.72077	14.8167	10.7303	15.634	10.9803	15.0282	10.4996	14.6629	14.6473	2.68425	-0.298311	0.0197177	-0.266099	0.0185417	-0.21957	0.0149358	-0.244472	0.0168656	-0.183759
Cate_17	B	F	1.60718	10.8788	1.89289	10.9359	2.40005	10.9359	2.12861	10.9359	2.64291	11.6145	2.7572	10.0145	3.19292	10.8145	2.69291	10.3788	3.20721	10.2502	4.82867	12.2645	5.72869	12.0788	4.77867	10.0288	5.87155	10.2145	7.08586	11.7788	7.44301	10.9716	7.86444	11.7359	8.14302	11.3788	7.83587	10.9645	10.0439	2.30697	-0.293883	0.0204301	-0.264948	0.0228531	-0.214749	0.0171229	-0.241615	0.0201897	-0.18304
Cate_18	B	F	0.97216	10.3813	1.3888	10.3882	1.91654	10.3952	1.64573	10.3882	2.1943	11.166	2.18736	9.52022	2.64566	10.2563	2.13875	9.87437	2.59011	9.65216	4.28445	11.652	5.20106	11.5409	4.24973	9.38134	5.35382	9.59661	6.68013	11.3882	6.86067	10.4716	7.61757	11.3257	7.77728	10.9299	7.47869	10.5202	10.3258	2.33464	-0.298824	0.0252547	-0.258672	0.0211095	-0.207829	0.0156783	-0.233959	0.0181404	-0.172206
Cate_21	B	F	0.951885	15.134	1.56724	15.2302	2.26914	15.2398	1.91338	15.2398	2.73066	16.009	2.74989	13.8168	3.61524	14.9513	2.89412	14.3744	3.63447	13.9321	6.12476	16.7109	7.40355	16.4416	5.77862	13.3937	7.53816	13.6245	9.46116	15.9897	9.95153	14.7494	10.5765	15.8744	10.9226	15.3552	10.5573	14.759	15.114	2.71562	-0.306447	0.0221554	-0.265429	0.02634	-0.218975	0.0245019	-0.242505	0.0257553	-0.185754
Cate_28	B	F	0.847374	11.6037	1.29015	11.6724	1.8856	11.6724	1.58787	11.7029	2.04591	12.3213	2.05355	10.6647	2.88565	11.3976	2.20623	11.0617	2.89329	10.8326	4.90103	12.9931	5.78657	12.7259	4.54986	10.6494	5.93162	10.5578	7.6111	12.3213	7.78668	11.3976	8.41267	12.1991	8.55771	11.7793	8.27526	11.3518	11.8413	2.47159	-0.301364	0.0163359	-0.263674	0.0200798	-0.213405	0.0173245	-0.238402	0.0212742	-0.196838
Cate_37	A	F	0.725152	9.11703	1.00586	9.15212	1.4503	9.14042	1.19884	9.14042	1.73686	9.66674	1.73101	8.22814	2.0585	8.89481	1.59066	8.64919	2.00586	8.36264	3.88892	9.94745	4.55559	9.70768	3.41523	7.8948	4.47957	8.00591	5.77782	9.28662	5.79537	8.53223	6.36262	9.08779	6.50298	8.7837	6.26906	8.4796	8.97404	2.19434	-0.294939	0.0167929	-0.263741	0.0215645	-0.214144	0.0216294	-0.24218	0.0208559	-0.183821
CueR_14	B	F	1.62494	13.2328	2.01659	13.2161	2.60823	13.1911	2.32491	13.1911	2.85822	13.8494	2.85822	12.1662	3.39986	12.7412	2.84989	12.5828	3.39986	12.2662	5.36645	14.1244	6.34975	13.9661	5.06646	11.9412	6.57474	12.0912	8.26634	13.7661	8.408	12.8745	9.31629	13.8994	9.62462	13.4661	9.30796	12.9495	12.047	2.48882	-0.289525	0.0297795	-0.25711	0.0264484	-0.208146	0.0214227	-0.231659	0.0228392	-0.184101
CueL_23	B	F	0.144	11.112	0.872	11.2	1.552	11.176	1.24	11.184	1.872	11.968	1.872	9.888	2.672	10.856	1.968	10.28	2.592	10.136	4.688	12.344	5.784	12.136	4.632	9.8	5.88	9.888	7.928	11.776	8.088	10.744	9.096	11.72	9.304	11.192	8.992	10.704	13.4814	2.60131	-0.315099	0.0225221	-0.260844	0.0265351	-0.210503	0.0224148	-0.233616	0.0240827	-0.184041
CueL_24	B	F	0.976625	11.1101	1.39071	11.1726	1.94544	11.1648	1.66417	11.1648	2.20327	11.7117	2.19545	10.1491	2.85956	11.032	2.19545	10.5475	2.89081	10.3522	4.57842	12.243	5.47691	12.0711	4.39872	10.1413	5.61755	10.2194	7.10202	11.8679	7.28953	11.0007	8.00051	11.7508	8.16459	11.321	7.92238	10.9538	10.874	2.38638	-0.302266	0.0215996	-0.263862	0.0246224	-0.21301	0.0202751	-0.23882	0.0221162	-0.185768
Finca1_3	B	F	0.67048	8.3521	0.91324	8.34632	1.33518	8.33476	1.0982	8.34632	1.50858	8.82028	1.49702	7.59492	1.92474	8.1498	1.39876	7.81456	2.00566	7.69896	3.45644	9.17864	4.10958	9.02258	3.20212	7.47354	4.23674	7.4273	5.42164	8.72202	5.58348	8.02264	6.2713	8.57752	6.29442	8.21916	6.03432	7.95906	8.69909	2.16322	-0.286441	0.0213245	-0.258537	0.0200012	-0.210051	0.0175241	-0.237267	0.0194972	-0.188784
Finca1_10	B	F	1.61048	8.59309	1.90118	8.56984	2.3256	8.54658	2.08723	8.55821	2.50583	9.00007	2.51165	7.72681	2.91281	8.33146	2.39537	8.0582	2.87793	7.82564	4.31399	9.29077	5.00004	9.13961	4.17445	7.50006	5.05237	7.54076	6.15121	8.88961	6.26168	8.19193	6.99424	8.75007	7.02331	8.41286	6.81982	8.12797	8.29308	2.11542	-0.293914	0.0293768	-0.258905	0.0259649	-0.207769	0.0222709	-0.236491	0.0241727	-0.185078
Finca1_21	B	F	1.30628	8.58908	1.5606	8.56596	1.97676	8.5544	1.75134	8.56018	2.20218	9.0168	2.20218	7.8608	2.52008	8.3521	2.05768	8.0631	2.5721	7.95328	3.8148	9.32314	4.43326	9.18442	3.6992	7.73942	4.55464	7.79722	5.61238	8.9879	5.69908	8.33476	6.358	8.86652	6.40424	8.57752	6.20194	8.31742	7.75858	2.0488	-0.295591	0.0281786	-0.262985	0.0236375	-0.20947	0.019587	-0.23846	0.021719	-0.177597
Finca1_22	B	F	1.73301	8.54573	2.02847	8.54573	2.42053	8.523	2.2103	8.54005	2.60804	8.9321	2.60236	7.83548	2.97169	8.34118	2.51144	8.11958	3.02282	7.94912	4.09104	9.15938	4.63083	9.01733	3.98308	7.75025	4.75015	7.72184	5.60245	8.81278	5.77291	8.19913	6.23315	8.75596	6.23315	8.523	6.14224	8.21617	6.85116	1.92442	-0.310444	0.0286529	-0.267323	0.0273061	-0.210201	0.022201	-0.240809	0.0256468	-0.18096
Finca1_24	B	F	1.00001	8.75588	1.23838	8.70356	1.7035	8.65705	1.48257	8.65705	2.09885	9.08728	2.10467	7.68029	2.30234	8.33728	1.7442	8.06402	2.41862	7.81402	3.79654	9.25007	4.50004	9.08147	3.51747	7.52913	4.42445	7.58146	5.74423	8.89542	5.814	8.19193	6.41866	8.84309	6.49424	8.51751	6.27912	8.19774	8.41035	2.12946	-0.297767	0.0408209	-0.269436	0.0343432	-0.214135	0.0282987	-0.240433	0.0285465	-0.166638
Finca_13	B	F	0.802332	8.54077	1.06396	8.52332	1.48838	8.50007	1.25582	8.52332	1.76746	9.03496	1.75583	7.79657	2.12211	8.31983	1.7035	8.05239	2.16862	7.8896	3.48259	9.25007	4.25003	9.10472	3.38375	7.69774	4.2791	7.69192	5.44772	8.90705	5.55237	8.221	6.26749	8.89542	6.36633	8.53495	6.21517	8.19193	8.42347	2.13102	-0.295724	0.0248984	-0.26475	0.0216432	-0.214485	0.0169572	-0.241979	0.0207714	-0.178941
Mar_2	B	F	1.57559	8.22681	1.83722	8.25007	2.22676	8.24425	2.02327	8.26169	2.45351	8.69193	2.45351	7.51169	2.80235	8.09309	2.33723	7.81983	2.87212	7.62215	4.10468	8.95937	4.76167	8.81984	3.96515	7.37215	4.74422	7.43611	5.93028	8.58146	5.94772	7.93611	6.55819	8.50007	6.63959	8.19193	6.51168	7.87797	7.73551	2.04582	-0.296823	0.020238	-0.262926	0.0223177	-0.212599	0.0201881	-0.238838	0.0231617	-0.18171
Mar_3	B	F	1.12566	8.25102	1.36565	8.27387	1.77134	8.25673	1.55992	8.29101	2.02276	8.72528	2.01704	7.53677	2.38274	8.08531	1.89705	7.77675	2.41702	7.65676	3.69696	9.00526	4.37692	8.86241	3.59411	7.36535	4.46835	7.49105	5.54258	8.65671	5.70829	8.01103	6.30254	8.58243	6.39968	8.27387	6.13684	7.98817	8.01676	2.08153	-0.294034	0.0226028	-0.263997	0.0241597	-0.213522	0.0198403	-0.239689	0.02525	-0.179665
Mar_4	B	F	0.654976	8.39188	0.959072	8.39773	1.45615	8.36849	1.19884	8.39188	1.73101	8.92405	1.73686	7.51468	2.10528	8.10533	1.64329	7.80123	2.21054	7.64918	3.67839	9.14627	4.41524	8.95329	3.63161	7.4562	4.56144	7.41526	5.70765	8.772	5.92987	8.0527	6.5907	8.74276	6.69011	8.36264	6.46204	7.98837	9.13106	2.21168	-0.300932	0.0274492	-0.267611	0.0268179	-0.213312	0.0215389	-0.241385	0.0251746	-0.180896
Mar_7	B	F	0.8571	8.51957	1.11423	8.51957	1.58278	8.52529	1.31993	8.54814	1.83991	9.01669	1.83991	7.74818	2.15989	8.38815	1.69706	8.04531	2.16561	7.87961	3.59411	9.25668	4.2855	9.07955	3.35983	7.62819	4.30836	7.62248	5.51972	8.8967	5.65115	8.22816	6.27969	8.8567	6.34254	8.54243	6.17683	8.23387	8.37516	2.12527	-0.295751	0.0224159	-0.26506	0.0213418	-0.209116	0.0200651	-0.24039	0.0238904	-0.176374
Mar_13	B	F	1.32842	10.4814	1.80285	10.5252	2.36488	10.5179	2.06562	10.5106	2.56195	11.1091	2.56195	9.54709	3.16777	10.3573	2.62034	9.91204	3.28455	9.80256	4.65676	11.4813	5.51075	11.3062	4.69326	9.5106	5.72242	9.60548	6.97055	11.1894	7.20411	10.3938	7.90482	11.2332	7.97781	10.8317	7.93401	10.3865	10.0116	2.30374	-0.312042	0.0279927	-0.264436	0.0280831	-0.20856	0.0223023	-0.238412	0.0242684	-0.183613
Mar_14	B	F	0.389334	10.3364	0.87791	10.3517	1.49626	10.3364	1.168	10.3822	1.75582	11.1762	1.74055	9.32111	2.45815	10.2143	1.84743	9.64174	2.59556	9.48143	4.39718	11.909	5.43541	11.8174	4.40482	9.22951	5.78657	9.44326	7.2523	11.6037	7.55003	10.512	8.43557	11.4815	8.51191	11.0464	8.30579	10.512	12.4869	2.52468	-0.299029	0.0267977	-0.260063	0.022938	-0.211101	0.0153047	-0.236701	0.0223494	-0.181758
Maxa_5	B	F	0.37595	10.3386	0.947394	10.4063	1.6241	10.3612	1.30079	10.4063	1.83464	11.1281	1.82712	9.27093	2.63165	10.2108	1.94742	9.63184	2.70684	9.42883	4.45125	11.6845	5.42872	11.5417	4.25575	9.22581	5.61669	9.39875	7.33854	11.2785	7.64682	10.3236	8.46639	11.2484	8.63181	10.7672	8.34609	10.301	12.326	2.51171	-0.308409	0.0251376	-0.261724	0.026259	-0.207381	0.0174718	-0.233169	0.0235722	-0.184524
Maxa_7	B	F	0.307086	11.0315	0.90551	10.9527	1.49606	10.9291	1.22047	10.937	1.88189	11.8031	1.87401	9.73226	2.59842	10.7401	1.81889	10.0787	2.51968	9.91337	4.59842	12.2913	5.67715	12.0945	4.40157	9.59841	5.92912	9.6299	7.70865	11.748	7.96061	10.6614	8.67715	11.622	8.96061	11.1417	8.73227	10.622	13.0733	2.57057	-0.303544	0.0320498	-0.258231	0.0231653	-0.213243	0.0185226	-0.234254	0.020449	-0.179579
Maxa_8	B	F	1.32	11.64	1.76	11.632	2.312	11.632	2.024	11.632	2.6	12.264	2.608	10.528	3.048	11.36	2.432	11	3.064	10.736	4.864	12.584	5.664	12.424	4.672	10.384	5.84	10.416	7.224	12.056	7.384	11.152	8.104	11.976	8.288	11.608	8.12	11.176	10.55	2.35612	-0.302489	0.0273201	-0.260823	0.0252084	-0.208517	0.0235082	-0.235807	0.0243953	-0.179281
Maxa_10	B	F	0.176	11.216	0.816	11.16	1.448	11.096	1.088	11.128	1.808	11.872	1.808	9.856	2.536	10.84	1.8	10.224	2.456	10.048	4.552	12.288	5.6	12.104	4.248	9.696	5.664	9.84	7.488	11.808	7.664	10.76	8.672	11.744	8.792	11.272	8.52	10.712	12.8736	2.55518	-0.309257	0.0349038	-0.259841	0.0278898	-0.211067	0.020286	-0.238866	0.0242716	-0.17989
Maxa_11	B	F	0.927113	14.3963	1.66672	14.3338	2.32299	14.3025	1.94798	14.3234	2.72925	15.3234	2.73967	12.9275	3.58345	14.0213	2.75009	13.3233	3.88554	13.1254	6.34395	16.0838	7.67733	15.8547	6.19811	12.7087	7.91692	12.6879	10.1982	15.3651	10.4066	13.9796	11.5837	15.1984	11.792	14.5525	11.4587	13.9171	16.5213	2.80465	-0.299692	0.0280409	-0.255244	0.0214474	-0.215697	0.017056	-0.238282	0.019745	-0.187252
Maxa_13	B	F	1.12504	14.8963	1.80214	14.8546	2.54175	14.8026	2.12507	14.8442	3.08343	15.6359	3.07301	13.4275	3.75012	14.365	2.89593	13.8442	3.97929	13.6567	6.28145	15.9484	7.51066	15.6984	6.01061	13.1567	7.77108	13.1983	9.8024	15.3547	9.9899	14.1775	11.0524	15.3026	11.3441	14.7192	11.1045	14.1671	15.2484	2.72448	-0.309129	0.0305989	-0.264799	0.0266601	-0.216371	0.0219225	-0.24363	0.0253987	-0.179356
Oxo_18	B	F	0.434264	8.611	0.708536	8.56529	1.17137	8.54243	0.925668	8.54814	1.3885	8.99384	1.40564	7.69676	1.77134	8.33101	1.27994	8.03388	1.82848	7.81104	3.29698	9.28525	4.00551	9.10812	3.10842	7.57105	4.01123	7.59391	5.23974	8.87956	5.36545	8.19388	6.06255	8.8167	6.16541	8.47958	5.99399	8.18245	8.72557	2.16626	-0.294417	0.0315187	-0.263124	0.0254705	-0.210158	0.0214811	-0.238295	0.0228636	-0.18394
Pozo_3	B	F	1.47993	8.531	1.68563	8.53672	2.10847	8.50815	1.89705	8.51386	2.31988	8.97669	2.31417	7.85675	2.66844	8.34244	2.17132	8.05674	2.75415	7.9596	3.97123	9.23954	4.61691	9.11383	3.85695	7.77104	4.57691	7.73676	5.74257	8.94812	5.84542	8.31387	6.42254	8.92527	6.51967	8.65671	6.34825	8.3653	7.70408	2.04175	-0.292318	0.0256801	-0.265605	0.0248729	-0.211012	0.0179894	-0.238373	0.020321	-0.18008
Vic_1	B	F	0.128656	8.45036	0.391816	8.4679	0.795328	8.43866	0.602344	8.44451	1.12866	9.01762	1.13451	7.52638	1.44446	8.13457	0.871352	7.85971	1.49124	7.69597	3.3626	9.39189	4.05851	9.21645	3.12868	7.28661	4.21641	7.36263	5.58484	8.9182	5.77198	8.08194	6.46789	8.81294	6.5673	8.46206	6.38602	8.09948	10.083	2.31085	-0.281646	0.0240988	-0.255478	0.0248505	-0.215566	0.0204388	-0.234687	0.021743	-0.180348
Vic_2	B	F	0.339184	8.45621	0.61404	8.47375	1.07018	8.44451	0.842112	8.47375	1.38598	9.05855	1.38013	7.55562	1.76025	8.1989	1.22808	7.82462	1.77779	7.59655	3.47956	9.40943	4.26904	9.23984	3.35675	7.36848	4.35676	7.50298	5.67256	8.97668	5.72519	8.11118	6.65502	8.85972	6.69011	8.4796	6.45619	8.13457	9.78517	2.28087	-0.288555	0.0249698	-0.260398	0.0254636	-0.213951	0.0203257	-0.237106	0.0243867	-0.178806
Vic_3	B	F	0.22542	8.40412	0.49708	8.40412	0.96526	8.39834	0.71672	8.4099	1.3005	8.98212	1.30628	7.52556	1.66464	8.19026	1.11554	7.84346	1.63574	7.64694	3.4102	9.28268	4.16738	9.10928	3.19634	7.38684	4.3061	7.43886	5.56614	8.8434	5.65284	8.05732	6.33488	8.73936	6.51984	8.41568	6.31754	8.05154	9.65447	2.26742	-0.292001	0.0230554	-0.263869	0.0220246	-0.215414	0.0196481	-0.241105	0.0217883	-0.178491
Vic_9R	B	F	0.7485	8.83829	1.02994	8.87422	1.52095	8.87422	1.27544	8.8802	1.82634	9.37721	1.82035	7.99997	2.17963	8.69458	1.5988	8.32332	2.13772	8.13769	3.77843	9.74248	4.47902	9.59278	3.55687	7.7365	4.5389	7.85027	5.86225	9.30535	6.01794	8.52092	6.6886	9.13769	6.70656	8.79637	6.49099	8.44308	9.1913	2.21826	-0.294518	0.0200939	-0.263789	0.0231465	-0.210374	0.0216554	-0.237064	0.0230521	-0.175627
Vic_11	B	F	1.19676	11.3446	1.79514	11.443	2.43451	11.4348	2.10663	11.443	2.80337	12.2463	2.77878	10.1971	3.32798	11.2873	2.69681	10.7299	3.45913	10.5004	5.08214	12.6644	6.08217	12.5824	5.03296	10.2626	6.52481	10.4758	7.9101	12.3611	8.22979	11.4512	9.07408	12.3611	9.22982	11.902	9.03309	11.4758	11.9852	2.48367	-0.311022	0.0254304	-0.260483	0.0280692	-0.20751	0.0214947	-0.23464	0.0251972	-0.169427
Vic_12	B	F	1.94159	12.2745	2.44157	12.2495	3.06654	12.2578	2.74989	12.2578	3.3832	12.8912	3.3832	11.0579	3.97484	11.9829	3.29987	11.5662	3.94151	11.2995	5.98309	13.3078	6.90806	13.0828	5.64977	10.8079	7.04139	10.9496	8.56632	12.7745	8.81631	11.8662	9.56628	12.7578	9.76628	12.2745	9.47462	11.8579	11.7794	2.46635	-0.305695	0.0292947	-0.263373	0.0253544	-0.210321	0.0237833	-0.237186	0.0249373	-0.181148
Vic_13	B	F	1.75011	11.5975	2.17755	11.6781	2.66952	11.6781	2.40337	11.6862	3.00018	12.2911	3.00018	10.6135	3.50021	11.541	2.88727	11.0329	3.47601	10.8555	5.20193	12.7185	6.03262	12.5733	5.0003	10.4764	6.23424	10.6135	7.50045	12.2669	7.75047	11.3797	8.59729	12.0975	8.65375	11.7104	8.40373	11.2829	10.464	2.34795	-0.300765	0.0187833	-0.259568	0.0244081	-0.212595	0.0220232	-0.237967	0.0240828	-0.178058
Vic_14	B	F	1.80826	12.2662	2.39157	12.3078	2.94155	12.2828	2.64989	12.2912	3.3082	12.9828	3.29154	11.1496	3.88318	12.0912	3.26654	11.5162	3.87485	11.4162	5.45812	13.3745	6.35808	13.2828	5.39978	11.0496	6.65807	11.4745	7.90802	13.0578	8.13301	12.2495	8.89964	13.0745	9.08297	12.5995	8.84965	12.1745	10.7641	2.37622	-0.316573	0.032644	-0.262255	0.0310664	-0.211606	0.0236357	-0.23851	0.0271214	-0.17118
Vic_15	B	F	2.09158	11.6745	2.53323	11.6995	3.10821	11.7079	2.83322	11.6829	3.36653	12.4245	3.36653	10.7912	3.98317	11.5745	3.36653	11.0579	3.95818	10.9912	5.49978	12.8578	6.34975	12.6912	5.48311	10.7912	6.5664	10.8912	7.91635	12.5078	8.21634	11.7079	8.95797	12.4328	9.10797	12.0245	8.81631	11.6579	10.4559	2.34717	-0.306731	0.0241102	-0.264445	0.0224353	-0.209611	0.0179475	-0.236031	0.0180945	-0.178425
Vic_16	A	F	1.87685	11.3919	2.33068	11.4688	2.86912	11.4765	2.58451	11.4842	3.0768	12.0611	3.09218	10.5227	3.63062	11.2611	3.0768	10.8611	3.67678	10.6919	5.13826	12.438	5.90746	12.3072	4.97672	10.4227	6.18437	10.5227	7.32278	12.1226	7.65354	11.3765	8.23044	12.1072	8.38428	11.7918	8.22275	11.3688	9.77385	2.27971	-0.308659	0.02471	-0.261693	0.0283105	-0.206742	0.0240683	-0.235678	0.0275081	-0.180112
Vic_19	B	F	0.892512	11.4539	1.41314	11.4622	2.00815	11.4456	1.66933	11.4456	2.20649	12.1398	2.22302	10.4044	2.96678	11.2556	2.30566	10.7597	2.97504	10.5118	4.92534	12.6026	5.80959	12.396	4.71048	10.2639	5.99966	10.3548	7.40454	12.1894	7.66899	11.239	8.54498	12.115	8.71852	11.6936	8.44581	11.3052	11.7448	2.46341	-0.305542	0.027722	-0.261269	0.02519	-0.210824	0.0200887	-0.239607	0.0221945	-0.189652
Vic_21	B	F	1.126	12.1507	1.72262	12.1759	2.34444	12.1423	2.00832	12.1759	2.64695	12.7726	2.66375	11.0163	3.32759	11.8818	2.5125	11.3861	3.25196	11.176	5.22667	13.1843	6.1594	12.9826	4.85693	10.7642	6.20141	10.8735	7.78958	12.6381	8.06688	11.739	8.83996	12.6213	9.01642	12.2096	8.73072	11.7306	11.7396	2.46297	-0.312629	0.0275652	-0.261756	0.0276125	-0.208934	0.0225641	-0.237431	0.0266068	-0.180958
Vic_25	B	F	0.7788	12.5051	1.42485	12.6201	2.18595	12.6201	1.76115	12.6201	2.4249	13.3989	2.4249	11.266	3.3807	12.2838	2.59305	11.6997	3.30105	11.6023	5.4516	14.0273	6.5313	13.806	5.26575	11.1422	6.7968	11.39	8.55795	13.4609	8.71725	12.3546	9.85005	13.3724	10.0978	12.8679	9.7527	12.3546	13.8108	2.62545	-0.310207	0.0225797	-0.262916	0.0273051	-0.207942	0.0230883	-0.238623	0.0254417	-0.186355
Vic_27	B	F	0.288288	12.5676	0.981981	12.5405	1.63964	12.5315	1.28829	12.5405	2	13.5045	2.00901	11.1351	2.93693	12.2883	2.09009	11.5676	2.97297	11.4054	5.42342	14.0901	6.63062	13.8739	5.18018	11.054	6.89189	11.2883	8.91891	13.4594	8.88287	12.2522	10.2703	13.3513	10.4955	12.7567	10.0901	12.1441	15.2889	2.72712	-0.303591	0.0264966	-0.258416	0.0217957	-0.215498	0.0184189	-0.238408	0.0204966	-0.187836
Vic_28	B	F	0.836237	11.9056	1.52592	11.9573	2.20698	11.9659	1.84489	11.9487	2.47423	12.8108	2.48285	10.6814	3.36219	11.7332	2.59492	11.0866	3.42254	10.9487	5.44847	13.5091	6.61231	13.3453	5.25881	10.8107	6.74162	10.9487	8.71583	13.0436	9.25895	11.9832	9.90553	12.9487	10.1211	12.4229	9.8107	11.9401	13.9617	2.63632	-0.307965	0.02487	-0.258432	0.023508	-0.209803	0.0191345	-0.235748	0.0205583	-0.184549
Vic_29	B	F	0.90909	14.2626	1.63636	14.2929	2.32323	14.303	1.94949	14.2929	2.74747	15.1616	2.75757	12.7071	3.66666	13.9899	2.71717	13.2424	3.62626	12.9394	6.49494	15.8081	7.74747	15.6565	6.21211	12.5757	8.24242	12.7071	10.1414	15.3535	10.3939	14.0202	11.4242	15.3232	11.7273	14.6667	11.3131	14.0606	16.4642	2.80119	-0.301388	0.0289108	-0.257196	0.0271961	-0.215528	0.0244517	-0.238221	0.0256662	-0.185634
Pozo_13	B	F	1.37353	8.09752	1.64364	8.10902	2.1034	8.08603	1.86203	8.09752	2.36776	8.61475	2.35627	7.41363	2.66086	7.95385	2.20685	7.68949	2.6896	7.54006	4.00566	8.92509	4.56886	8.8044	3.83325	7.40214	4.66656	7.41363	5.54586	8.55728	5.76999	7.93661	6.2355	8.41935	6.33894	8.132	6.15504	7.87914	7.49144	2.01376	-0.308453	0.0217436	-0.272341	0.0213308	-0.211192	0.014956	-0.243299	0.0182262	-0.172131
Cate_27	B		1.35488	17.0973	2.06458	16.9575	2.76352	16.9252	2.43018	16.9467	3.31192	17.8715	3.29042	15.5058	4.41948	16.4521	3.58075	16.0112	4.47325	15.7424	7.0002	18.7425	8.54864	18.4629	6.59159	15.237	8.46261	15.2262	10.667	18.0328	10.8605	16.5811	11.9358	17.7317	12.2477	17.065	11.8821	16.4736	16.4055	2.79762	-0.308797	0.033411	-0.266058	0.0224665	-0.223562	0.0180861	-0.243814	0.0205477	-0.186891
Maxa_12	B		0.694176	11.8671	1.40488	11.7679	2.04947	11.7431	1.70238	11.7431	2.52878	12.5613	2.52052	10.3383	3.15685	11.4539	2.39656	10.8589	3.22296	10.611	4.91708	12.867	6.11536	12.7018	4.96666	10.4126	5.97487	10.3961	7.94997	12.3547	8.18136	11.2225	9.23915	12.3134	9.36311	11.7184	9.08214	11.2142	12.7056	2.54204	-0.318177	0.0374244	-0.262603	0.0272652	-0.211925	0.0231553	-0.239255	0.0243199	-0.171468
Cate_24	B		1.35875	17.6746	2.04356	17.6855	2.70663	17.6311	2.36966	17.6311	3.25013	18.392	3.22839	15.8267	4.09799	17.0115	3.11969	16.5985	4.0219	16.0985	6.78288	18.9029	8.07641	18.6747	6.17416	15.4789	8.3699	15.718	10.5548	18.5551	10.8809	17.1637	11.8266	18.6203	12.2287	18.0225	11.9026	17.3594	16.5382	2.80568	-0.295837	0.0381857	-0.254451	0.0359063	-0.214613	0.0297818	-0.234979	0.0312307	-0.178535
Aga_3	B	M	0.724722	8.3652	1.04495	8.34835	1.49439	8.31464	1.24158	8.32588	1.70787	8.78093	1.71349	7.46632	2.12922	8.02812	1.64046	7.84835	2.11237	7.56183	3.53372	9.09554	4.24721	8.927	3.50563	7.33711	4.26968	7.34273	5.50002	8.67419	5.65171	7.95509	6.28092	8.56183	6.41576	8.20228	6.16856	7.88205	8.58789	2.15035	-0.299234	0.0300221	-0.261992	0.0271877	-0.209748	0.0220375	-0.239155	0.0240354	-0.183613
Cate_2	B	M	0.96743	17.305	1.67398	17.142	2.26096	17.0985	1.9566	17.1311	2.97838	17.979	2.96751	15.2397	3.70667	16.7181	2.81533	16.0115	3.65232	15.4137	6.57635	18.5116	8.27207	18.229	6.57635	14.9789	8.06554	15.0441	10.8591	17.979	11.3809	16.5333	12.3809	18.1203	12.8701	17.4137	12.3483	16.6637	18.0361	2.89237	-0.290845	0.0409417	-0.252201	0.0297311	-0.219756	0.025493	-0.236549	0.028247	-0.177278
Cate_3	B	M	1.00923	13.7867	1.37033	13.907	1.83328	13.9163	1.58329	13.8978	2.18512	14.8514	2.16661	12.8052	2.99992	13.7867	2.39808	13.1293	3.17584	12.9533	5.64799	15.9255	6.96277	15.6847	5.54614	12.7867	7.49053	12.8515	9.07382	15.3792	9.59232	14.194	10.2312	15.5273	10.7219	15.1292	10.6664	14.5274	15.4627	2.73843	-0.275878	0.0173032	-0.251545	0.0214465	-0.221751	0.0174894	-0.23797	0.0187632	-0.190038
Cate_9	B	M	1.21049	17.189	1.99994	17.1784	2.69466	17.1047	2.32625	17.1153	3.18938	17.9153	3.18938	15.5048	4.22093	16.7048	3.27359	16.1469	4.15777	15.7574	6.61033	18.5679	8.09449	18.3363	6.09455	15.0838	8.11555	15.0943	10.2734	17.8626	10.3681	16.4942	11.6628	17.7889	11.9365	17.1784	11.547	16.5785	15.9973	2.77242	-0.308875	0.0329322	-0.259576	0.0302377	-0.21632	0.0238397	-0.239332	0.0254512	-0.183299
Cate_20	B	M	1.4063	15.8026	1.82298	15.8547	2.34382	15.8443	2.0834	15.8338	2.87509	16.6672	2.87509	14.3338	3.66678	15.4901	3.03135	14.8026	3.86471	14.4275	6.61479	17.5422	7.91692	17.3964	6.28145	14.2296	8.7607	14.438	10.4795	17.3131	10.9899	16.0734	11.7087	17.511	12.1254	17.0005	11.8962	16.313	17.0065	2.8336	-0.277883	0.0319125	-0.253123	0.031454	-0.222779	0.026481	-0.238086	0.0280599	-0.184928
Cate_25	B	M	1.39394	15.7273	1.9899	15.8485	2.57576	15.8081	2.25252	15.798	2.86868	16.7172	2.91919	14.5353	3.86868	15.6363	3.21212	15.0303	3.96969	14.6768	6.40403	17.8182	7.62625	17.6666	6.18181	14.4343	7.66666	14.6464	9.94948	17.2626	10.0303	15.9293	11.2121	16.899	11.3434	16.3636	10.8889	15.8384	15.3041	2.72812	-0.295025	0.0187881	-0.255427	0.0224921	-0.217574	0.0157707	-0.238681	0.0173767	-0.192147
Cate_26	B	M	1.2366	16.1187	2.03232	16.108	2.699	16.108	2.35491	16.1187	3.05385	17.1618	3.05385	14.8391	4.16141	15.9359	3.58075	15.4198	4.23668	15.0112	6.53782	18.2801	7.8927	18.0758	6.47331	14.7854	8.18303	15.0972	10.3444	17.7532	10.4842	16.3015	11.9896	17.5596	12.0971	16.9037	11.624	16.2585	16.26	2.78871	-0.306363	0.0249748	-0.257847	0.0183448	-0.217074	0.0133291	-0.238038	0.0165733	-0.18745
Cate_29	B	M	1.20589	15.8629	1.7255	15.8629	2.28433	15.8433	1.99021	15.8335	2.78434	16.657	2.78434	14.4413	3.54905	15.4021	2.82355	14.9707	3.61768	14.5884	5.97064	17.4217	7.24516	17.2158	5.69612	14.0295	7.73536	14.3923	9.5687	16.8335	10.1177	15.6276	10.7942	16.8335	11.1079	16.3335	10.7942	15.706	15.3284	2.72971	-0.288844	0.0314798	-0.25505	0.028513	-0.218799	0.0240436	-0.237993	0.025089	-0.181638
CueR_15	B	M	0.557878	16.6837	1.18944	16.5995	1.91573	16.5153	1.51574	16.5469	2.32625	17.4942	2.32625	15.1364	3.1999	16.0522	2.44203	15.5995	3.17885	15.1364	6.04192	18.0942	7.45241	17.7258	5.32616	14.7048	7.4103	14.7048	9.9997	17.1469	9.97865	15.789	11.4102	16.9574	11.6418	16.2627	11.3365	15.6416	16.8494	2.82431	-0.294068	0.0273924	-0.256614	0.0220655	-0.213523	0.016685	-0.237261	0.0187703	-0.188626
CueR_16	B		1.22102	16.5048	1.81047	16.5048	2.45256	16.4627	2.12625	16.4837	2.75781	17.4205	2.75781	15.2522	3.71568	16.1785	2.83149	15.7574	3.67357	15.2732	6.34718	18.3679	7.64188	18.1468	6.0735	14.7575	7.90503	15.1153	10.3155	17.7468	10.3997	16.3258	11.6628	17.5574	11.9154	16.9469	11.4944	16.3364	16.4304	2.79913	-0.287088	0.0232221	-0.251309	0.0203085	-0.212527	0.0145777	-0.232239	0.0174692	-0.189248
CueR_18	B	M	0.886392	11.4095	1.37883	11.4549	1.96218	11.4246	1.66672	11.4473	2.15158	12.1595	2.16674	10.4397	3.0001	11.3261	2.38644	10.8034	2.91676	10.5609	4.9244	12.758	5.88655	12.614	4.68197	10.47	6.18202	10.5912	7.71237	12.5383	7.9851	11.6292	8.7427	12.6746	9.02302	12.2352	8.6821	11.7201	12.3041	2.50993	-0.299039	0.026903	-0.258858	0.02525	-0.21215	0.0165129	-0.235729	0.0215322	-0.188929
CueR_25	B	M	0.948096	11.3549	1.39992	11.2957	1.93323	11.266	1.67398	11.2735	2.22951	11.8808	2.24432	10.2513	2.81466	10.9624	2.2221	10.6661	2.748	10.3994	4.62197	12.2734	5.48118	12.103	4.32569	10.2143	5.66636	10.2883	7.11072	11.9697	7.33293	11.0587	8.13289	11.9475	8.3551	11.5253	8.13289	11.0883	11.1052	2.40742	-0.300173	0.034159	-0.259952	0.0259637	-0.212213	0.0199066	-0.235466	0.0222231	-0.181673
CueR_26	B	M	0.802638	10.5856	1.13817	10.6251	1.57896	10.579	1.34869	10.6053	1.87502	11.1909	1.86844	9.75008	2.31581	10.4277	1.82238	10.033	2.32897	9.90797	4.00661	11.5396	4.75004	11.3817	3.61845	9.63823	4.80925	9.70402	6.28294	11.0988	6.36847	10.2896	7.30269	10.9277	7.42769	10.5396	7.17111	10.1909	9.98547	2.30113	-0.291219	0.0174732	-0.257482	0.0203877	-0.213453	0.0144182	-0.236446	0.0177624	-0.181908
CueL_13	B	M	1.23561	8.3389	1.55169	8.3274	2.02294	8.29867	1.76433	8.3274	2.2988	8.72395	2.29305	7.49984	2.62063	8.01132	2.14363	7.78144	2.54592	7.60903	3.95394	8.87912	4.63783	8.74119	3.70682	7.36191	4.6953	7.39064	5.75275	8.56878	6.00561	7.9596	6.43089	8.58027	6.6033	8.28143	6.37917	7.96534	8.03034	2.08323	-0.306597	0.0325876	-0.26727	0.0300442	-0.208678	0.0248047	-0.240785	0.0292926	-0.172822
Finca1_17	B	M	1.0404	8.34632	1.28894	8.34054	1.734	8.32898	1.49702	8.34054	1.94208	8.74514	1.94786	7.5718	2.29466	8.1498	1.86116	7.87814	2.33512	7.72208	3.56626	9.01102	4.22518	8.88964	3.45066	7.44464	4.26564	7.49088	5.41008	8.67	5.55458	8.03998	6.0112	8.59486	6.14414	8.2943	6.01698	8.01686	7.77495	2.05091	-0.298413	0.0269291	-0.266483	0.0251084	-0.209316	0.0216916	-0.239732	0.0242056	-0.180757
Finca1_18	B	M	0.825588	8.54077	1.12792	8.55821	1.56397	8.52914	1.32559	8.52914	1.83141	8.99426	1.83141	7.76169	2.23258	8.33728	1.73839	8.01751	2.30234	7.84309	3.58724	9.32566	4.34306	9.16286	3.37793	7.5582	4.32562	7.63378	5.63958	8.91286	5.73842	8.20355	6.42447	8.81402	6.48842	8.48263	6.30238	8.15123	8.5826	2.14974	-0.298205	0.0241824	-0.262926	0.0251765	-0.212227	0.0202948	-0.239996	0.0211131	-0.179476
Mar_5	A	M	0.90117	8.40704	1.19768	8.39542	1.67443	8.36053	1.44187	8.41286	1.9535	8.91868	1.94769	7.61053	2.31979	8.1396	1.77908	7.86053	2.34886	7.72099	3.74422	9.15124	4.46515	8.97682	3.59305	7.45355	4.4419	7.47099	5.68609	8.73263	5.84307	8.03495	6.46517	8.64542	6.52331	8.32565	6.30819	8.00588	8.51688	2.14205	-0.302279	0.0251897	-0.267502	0.0229562	-0.211636	0.017464	-0.238785	0.0242868	-0.177238
Maxa_6	B	M	1.19552	10.5792	1.67674	10.6544	2.24066	10.6319	1.94742	10.6469	2.51886	11.3537	2.51135	9.67695	3.19557	10.5266	2.55646	9.99275	3.19557	9.83485	4.83472	11.8875	5.76707	11.7071	4.84976	9.6544	5.94001	9.6544	7.48892	11.474	7.66186	10.5191	8.5491	11.4364	8.68445	10.9401	8.44384	10.4664	11.2345	2.41899	-0.304824	0.0202815	-0.261561	0.0232671	-0.2117	0.0169526	-0.237603	0.0205294	-0.181492
Maxa_9	B	M	0.584	11.064	1.064	11.152	1.72	11.128	1.4	11.16	1.992	11.968	2	10.056	2.84	11	2.088	10.376	2.848	10.256	4.696	12.496	5.848	12.312	4.712	9.984	5.888	10.032	7.768	11.984	7.928	10.872	8.896	11.968	9.144	11.384	8.856	10.856	12.8469	2.5531	-0.301352	0.0179045	-0.263572	0.0220393	-0.212746	0.0164926	-0.237428	0.0207729	-0.186891
Maxa_14	B	M	0.448818	11.5118	1.06299	11.4645	1.67716	11.4252	1.34645	11.4252	1.99212	12.1653	2.00787	10.0079	2.65354	11.1653	1.94488	10.5984	2.7244	10.2913	4.66141	12.5039	5.70865	12.2283	4.3307	9.73226	5.6929	9.76376	7.62991	11.7795	7.72439	10.685	8.85038	11.5827	8.97636	11.0472	8.60628	10.5433	12.7291	2.54389	-0.305725	0.0300085	-0.25744	0.0265872	-0.209136	0.0237789	-0.235135	0.0236267	-0.184715
Mimi_9	B	M	1.52633	8.53223	1.78949	8.55562	2.26318	8.53223	2.00586	8.54393	2.4971	9.00007	2.50879	7.83047	2.84798	8.36849	2.37429	8.041	2.90061	7.94158	4.16378	9.2106	4.8129	9.04101	3.94155	7.64918	4.8363	7.66088	5.89478	8.82463	6.11701	8.18135	6.61409	8.772	6.66087	8.45036	6.51467	8.14626	7.80439	2.05469	-0.304374	0.0222006	-0.270591	0.0245503	-0.20995	0.0203896	-0.242893	0.0225202	-0.178824
Mimi_10	B	M	1.74556	8.47926	1.95364	8.4966	2.32934	8.48504	2.12704	8.47926	2.56054	8.91854	2.56632	7.78566	2.8322	8.25962	2.38136	8.0342	2.8322	7.90126	4.10958	9.14396	4.71648	9.03414	3.91884	7.64694	4.64712	7.69318	5.78	8.86074	5.94762	8.23072	6.3291	8.77404	6.46204	8.53706	6.3291	8.24806	7.2842	1.98571	-0.290239	0.0251012	-0.261582	0.0262255	-0.210106	0.0223761	-0.237895	0.022803	-0.175776
Pozo_2	B	M	1.52592	8.67578	1.77446	8.68156	2.1964	8.65844	1.97676	8.67578	2.36402	9.1613	2.36402	8.05154	2.75706	8.5544	2.30622	8.24228	2.8611	8.19026	4.08646	9.54278	4.7107	9.42718	3.9593	8.0053	4.7107	8.02842	5.95918	9.18442	5.9823	8.51394	6.71636	8.97634	6.74526	8.68156	6.50828	8.42146	7.92513	2.07004	-0.294529	0.0171928	-0.263128	0.0164606	-0.21003	0.0110645	-0.237639	0.0145414	-0.185907
Pozo_5	B	M	1.00572	8.6205	1.27583	8.66648	1.7241	8.65498	1.49422	8.66073	1.91375	9.14922	1.91375	7.88488	2.33328	8.49407	1.81605	8.17798	2.31604	8.05155	3.63785	9.41933	4.35048	9.29865	3.49992	7.78719	4.28151	7.81592	5.57459	9.10325	5.70102	8.4251	6.31595	8.97681	6.39066	8.68372	6.14354	8.38487	8.17731	2.10136	-0.295635	0.0192188	-0.262379	0.0233831	-0.207663	0.0195693	-0.235723	0.0215071	-0.181827
Pozo_11	B	M	1.37079	8.03936	1.60675	8.05621	2.01686	8.05059	1.809	8.06183	2.26405	8.56745	2.25844	7.42138	2.48877	8.01127	2.08428	7.65733	2.54495	7.57306	3.72473	8.8315	4.30339	8.71914	3.60676	7.41014	4.32024	7.37643	5.47755	8.49442	5.57306	7.85396	6.15733	8.34273	6.22474	8.03374	6.01126	7.78093	7.33942	1.99326	-0.29641	0.0145876	-0.264164	0.0156518	-0.208316	0.0127469	-0.236581	0.0153604	-0.171947
Pozo_12	B	M	1.68563	8.31387	1.98276	8.34244	2.45131	8.34815	2.19418	8.34244	2.71986	8.79956	2.71986	7.5082	3.00556	8.14245	2.52559	7.84532	3.02842	7.68533	4.2855	9.01098	4.8969	8.88527	4.09122	7.42249	4.98261	7.45677	5.96542	8.67957	6.13684	8.03388	6.66824	8.52529	6.70824	8.23387	6.53682	7.97674	7.59174	2.02706	-0.308743	0.0239704	-0.269499	0.026639	-0.207762	0.0256669	-0.24165	0.0258609	-0.17073
Pozo_14	A	M	1.21708	8.11959	1.4685	8.10245	1.89133	8.10245	1.66277	8.10245	2.18275	8.62814	2.18846	7.35963	2.41702	7.89675	1.97133	7.64533	2.4913	7.45677	3.71981	8.93098	4.27979	8.79956	3.48554	7.19964	4.30836	7.26249	5.51972	8.611	5.714	7.91389	6.21112	8.49672	6.30254	8.17102	6.09112	7.89675	7.7528	2.04805	-0.294501	0.0274159	-0.262222	0.0233469	-0.207735	0.0202078	-0.237186	0.0219044	-0.166294
Vic_23	B	M	1.92	11.224	2.4	11.272	2.928	11.256	2.656	11.272	3.104	11.864	3.12	10.328	3.704	11.104	3.152	10.664	3.744	10.544	5.256	12.36	6.016	12.224	5.024	10.24	6.336	10.424	7.592	12.104	7.84	11.304	8.592	12.056	8.696	11.672	8.408	11.288	10.1576	2.31822	-0.304947	0.0265244	-0.257447	0.026145	-0.205913	0.0189934	-0.232379	0.0234365	-0.182236
Vic_26	B	M	0.188034	12.0256	0.863247	12.0684	1.52137	12.0342	1.15385	12.0598	1.82051	12.9487	1.84615	10.7692	2.62393	11.812	1.79487	11.2308	2.67521	10.9743	4.94017	13.641	6.07692	13.453	4.73504	10.6154	6.5641	10.7094	8.21367	13.2649	8.547	12.0342	9.43589	13.2051	9.75213	12.6239	9.53845	12.0598	14.5083	2.67472	-0.300999	0.0276199	-0.2544	0.0256695	-0.209519	0.0185691	-0.234534	0.0229829	-0.182394
[truncated: 27 more columns]
